# Supplementary material for: Mycosporine-Like Amino Acids (MAAs): Biology, Chemistry and Identification Features
Source: PubMed Central journal article supplement (PMC7828830; doi:10.3390/ph14010063), 2021-01-14
Supplement: pharmaceuticals-14-00063-s001.pdf [file pharmaceuticals-14-00063-s001.pdf]

# Supplementary Materials

Table S1. Patents on mycosporines and mycosporine-like amino acids.

| Year | Title                                                                                                                                                          | Patent n. <sup>o</sup>                       | Ref. <sup>1</sup> |
|------|----------------------------------------------------------------------------------------------------------------------------------------------------------------|----------------------------------------------|-------------------|
| 1984 | Mycosporine-like amino acid                                                                                                                                    | JPS59137450                                  | [1]               |
| 1987 | Sunscreen compositions and compounds for use therein                                                                                                           | WO1988002251<br>US5000946A                   | [2,3]             |
| 1990 | UV-absorbing compounds and compositions                                                                                                                        | WO1990009995<br>WO2000024369                 | [4]               |
| 2000 | Solar radiation protection composition                                                                                                                         | EP1123083<br>US6787147                       | [5–7]             |
| 2001 | Algal extracts containing amino acid analogs of mycosporin are useful as dermatological protecting agents against ultraviolet radiation                        | FR2803201A1<br>WO2003020236                  | [8]               |
| 2001 | The utilization of natural pigments from lichens, cyanobacteria, fungi and plants for sun protection                                                           | EP1424990A2<br>US20050129630<br>AU2002329025 | [9–12]            |
| 2001 | Topical cosmetic composition, useful for protecting skin and hair against sunlight, contains an extract from the red alga <i>Polysiphonia lanosa</i>           | FR2803200                                    | [13]              |
| 2002 | Personal care compositions                                                                                                                                     | WO2002039974<br>EP1341514A1                  | [14,15]           |
| 2002 | Natural UV filters derived from pigments of lichens                                                                                                            | IL0200725                                    | [16]              |
| 2003 | Extract having antioxidant activity and ultraviolet-absorbing activity, external preparation for skin, and food                                                | JP2004238519A                                | [17]              |
| 2004 | Cosmetic skin care products and cosmetic agents for protecting skin against premature aging                                                                    | EP1473028                                    | [18]              |
| 2004 | Beta-glucuronidase inhibitors for use in deodorants and antiperspirants                                                                                        | US20040234466                                | [19]              |
| 2005 | Amino-benzophenone UV filter formulations for the prevention of tanning                                                                                        | GB2412866                                    | [20]              |
| 2005 | Use of a mycosporin-type amino acid (porphyra 334) as an antioxidant                                                                                           | WO2007026035<br>ES2301293                    | [21,22]           |
| 2005 | Use of a mycosporin-type amino acid (shinorine) as an antioxidant                                                                                              | WO2007026038<br>ES2301426                    | [23,24]           |
| 2005 | Use of a mixture of mycosporin-type amino acids (asterin 330 + palythine) as an antioxidant                                                                    | WO2007026037                                 | [25]              |
| 2006 | Use of a mycosporin-type amino acid (M-gly) as an antioxidant                                                                                                  | WO2007026036<br>WO2007144779                 | [26]              |
| 2006 | Compositions comprising Porphyra and methods of making and using thereof                                                                                       | EP2001311<br>US20070220806                   | [27–29]           |
| 2006 | Sunscreen composition with extract of algae and lichens                                                                                                        | ES2317741<br>WO2008000431                    | [30]              |
| 2007 | Extracts of <i>Aphanizomenon flos-aquae</i> and nutritional, cosmetic and pharmaceutical composition containing the same                                       | EP2032122<br>US20100021493                   | [31–33]           |
| 2007 | <i>Alphanizomenon flos aquae</i> preparation, extracts and purified components thereof for the treatment of neurological, neurodegenerative and mood disorders | WO2008000430<br>EP2046354<br>US20090311286   | [34–36]           |
| 2007 | Mycosporin-like amino acid derivative having glycosyl group and method for producing the same                                                                  | JP2009120562                                 | [37]              |

| Year | Title                                                                                                                                                                                                              | Patent n. <sup>o</sup>                         | Ref. <sup>1</sup> |
|------|--------------------------------------------------------------------------------------------------------------------------------------------------------------------------------------------------------------------|------------------------------------------------|-------------------|
| 2007 | Cosmetic including natural substance having sun-screening function                                                                                                                                                 | CN101061995                                    | [38]              |
| 2008 | Antioxidant compound, antioxidant algae extract and method for producing the same                                                                                                                                  | JP2008247901A                                  | [39]              |
| 2009 | Cosmetic sunscreen composition                                                                                                                                                                                     | GB2472021<br>WO2011096628                      | [40]              |
| 2010 | Method for preparing UV screening nontoxic extract from red algae, and nontoxic sunscreen using same                                                                                                               | KR100969325<br>CN102740869<br>JP2013518871A    | [41]              |
| 2011 | Topical composition                                                                                                                                                                                                | WO2011158041                                   | [42]              |
| 2012 | Preparation method for laver mycosporine like amino acids porphyra-334                                                                                                                                             | CN102659621                                    | [43]              |
| 2012 | Beauty product containing desert algae radiation-proof ingredient and natural medical whitening ingredient and preparation method thereof                                                                          | CN102764206                                    | [44]              |
| 2013 | Imino compounds as protecting agents against ultraviolet radiations                                                                                                                                                | WO2013181741<br>US20150152046                  | [45,46]           |
| 2013 | Mycosporine-like amino acid and method for producing the same, UV protection agent, and antioxidant                                                                                                                | JP6049200B2                                    | [47]              |
| 2013 | Mycosporin-like amino acids, production method thereof, UV protecting agents and antioxidants                                                                                                                      | JP2014227339                                   | [48]              |
| 2013 | Method for extracting mycosporine-like amino acid shinorine from microcystis                                                                                                                                       | CN103755589                                    | [49]              |
| 2013 | Topical composition comprising transformed bacteria expressing a compound of interest                                                                                                                              | WO2014025938<br>US20140044677<br>US20160000701 | [50,51]           |
| 2013 | Synthesis of UV absorbing compounds                                                                                                                                                                                | WO2014082124<br>US20150299124                  | [52,53]           |
| 2013 | Anti-UV Composition for Skin External Application Comprising Peptide derivatives from Extract of Microalgae Comprising the Same                                                                                    | KR20150008238A                                 | [54]              |
| 2014 | UV absorbing compounds, compositions comprising same and uses thereof                                                                                                                                              | WO2015006803<br>US20160244409                  | [55,56]           |
| 2015 | Topical formulations for UV protection                                                                                                                                                                             | WO2015195546                                   | [57]              |
| 2015 | Method for producing mycosporine-like amino acid using microbes                                                                                                                                                    | WO2015174427<br>US2017202762A1<br>EP3144392A1  | [58–60]           |
| 2016 | Novel mycosporine-like amino acid                                                                                                                                                                                  | WO2017082144A1                                 | [61]              |
| 2016 | Wound healing composition for skin external application comprising Mycosporine-like amino acid and Method for Preparing the Same                                                                                   | KR20170090690A                                 | [62]              |
| 2016 | Culture method capable of improving mycosporine-like amino acid content in umbilical laver                                                                                                                         | CN105684880B                                   | [63]              |
| 2016 | Extraction of mycosporine-like amino acids consisting of amino acid derivatives, separation and purification with chemically modified surface-modified activated carbon filler, and automation of their production | JP6058853B1                                    | [64]              |
| 2017 | Microorganism for producing a mycosporine-like amino acid method for producing a mycosporine-like amino acid using the same                                                                                        | CA3072748A1                                    | [65]              |

| <b>Year</b> | <b>Title</b>                                                                                                                        | <b>Patent n.<sup>o</sup></b> | <b>Ref.<sup>1</sup></b> |
|-------------|-------------------------------------------------------------------------------------------------------------------------------------|------------------------------|-------------------------|
| 2018        | A microorganism for producing a Mycosporine-like amino acid and a method for preparing a Mycosporine-like amino acid using the same | KR102003911B1                | [66]                    |
| 2018        | Production of mycosporine-like amino acids in cyanobacteria                                                                         | WO2019094447A2               | [67]                    |
| 2020        | Microorganism for producing a mycosporine-like amino acid and method for producing a mycosporine-like amino acid using the same     | US20200283810A1              | [68]                    |
| 2020        | Solution containing stabilized mycosporine-like amino acid and method for producing the same                                        | JP2020114871A                | [69]                    |

<sup>1</sup> Ref: References.

**Table S2.** Mycosporines and mycosporine-like amino acids (MAAs) with their corresponding absorption maxima ( $\lambda_{\max}$ ), molar absorptivities ( $\epsilon$ ), molecular formula, exact mass, molecular structure, fragments (underline font represents  $[M+H]^+$ ) and phylum, (-) no information available.

| Compound<br>Pubchem CID                        | $\lambda_{\max}$ (nm)<br>$\epsilon$ ( $M^{-1}.cm^{-1}$ ) | Molecular Formula<br>Exact mass                         | Molecular structure<br>Smiles                                                                                         | Fragments                                                                | Phylum                                          | Ref.              |
|------------------------------------------------|----------------------------------------------------------|---------------------------------------------------------|-----------------------------------------------------------------------------------------------------------------------|--------------------------------------------------------------------------|-------------------------------------------------|-------------------|
| <b>Mycosporine-like amino-acids precursors</b> |                                                          |                                                         |                                                                                                                       |                                                                          |                                                 |                   |
| 4-Deoxygadusol<br>(Cyclohexenone)<br>85926716  | 269<br>15,700                                            | C <sub>8</sub> H <sub>12</sub> O <sub>5</sub><br>188.07 | 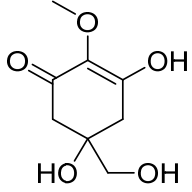<br><br>OC(CC(CO)(O)C1)=C(OC)C1=O  | 66.9, 70.0, 85.3,<br>95.0, 113.4, 160.0,<br>175.2, <u>189.2</u>          | Cnidaria,<br>Equinodermata,<br>Lichen, Chordata | [70-73]           |
| Gadusol<br>195955                              | 268<br>12,400                                            | C <sub>8</sub> H <sub>12</sub> O <sub>6</sub><br>204.06 | <br><br>OC(CC(CO)(O)C1O)=C(OC)C1=O | 58.3, 84.8, 117.5,<br>145.2, 160.0, 175.1,<br>203.7, 204.9, <u>205.4</u> | Arthropoda, Chordata,<br>Lichen                 | [70,72,74-<br>76] |
| <b>Oxo-mycosporines</b>                        |                                                          |                                                         |                                                                                                                       |                                                                          |                                                 |                   |

| Compound<br>Pubchem CID              | $\lambda_{\max}$ (nm)<br>$\epsilon$ ( $M^{-1}\cdot cm^{-1}$ ) | Molecular Formula<br>Exact mass | Molecular structure<br>Smiles                                                                                                          | Fragments                                                         | Phylum                                                                                                                                                                                       | Ref.          |
|--------------------------------------|---------------------------------------------------------------|---------------------------------|----------------------------------------------------------------------------------------------------------------------------------------|-------------------------------------------------------------------|----------------------------------------------------------------------------------------------------------------------------------------------------------------------------------------------|---------------|
| Mycosporine-ethanolamine<br>14444486 | 310<br>28,100                                                 | $C_{10}H_{17}NO_5$<br>231.11    | 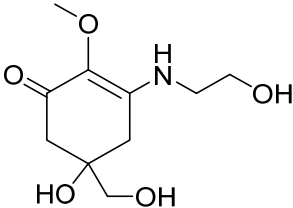<br><chem>O=C1CC(CO)(O)CC(NCCO)=C1OC</chem>         | -                                                                 | Porifera                                                                                                                                                                                     | [77]          |
| Mycosporine-glycine<br>14444486      | 310<br>28,100                                                 | $C_{10}H_{15}NO_6$<br>245.09    | <br><chem>O=C1CC(CO)(O)CC(NCC(=O)O)=C1OC</chem>     | 57.1, 84.9, 100.1,<br>117.7, 143.9, 171.2,<br>231.7, <u>246.4</u> | Arthropoda,<br>Chlorophyta,<br>Chordata, Cnidaria,<br>Cyanobacteria,<br>Dinoflagellata,<br>Echinodermata,<br>Lichen, Miozoa,<br>Mollusca, Ochrophyta,<br>Phaeophyta, Porifera,<br>Rhodophyta | [70,71,78-83] |
| Mycosporine-alanine<br>14444486      | 310<br>640                                                    | $C_{11}H_{17}NO_6$<br>259.11    | <br><chem>O=C1CC(CO)(O)CC(NC(C)C(=O)O)=C1OC</chem> | 147, <b>171</b> , 42, <u>260,1</u>                                | Fungi                                                                                                                                                                                        | [84]          |

| Compound<br>Pubchem CID       | $\lambda_{\max}$ (nm)<br>$\epsilon$ ( $M^{-1}.cm^{-1}$ ) | Molecular Formula<br>Exact mass | Molecular structure<br>Smiles                                                                                                       | Fragments                                    | Phylum                           | Ref.       |
|-------------------------------|----------------------------------------------------------|---------------------------------|-------------------------------------------------------------------------------------------------------------------------------------|----------------------------------------------|----------------------------------|------------|
| Mycosporine- $\beta$ -alanine | -<br>-                                                   | $C_{11}H_{17}NO_6$<br>259.11    | 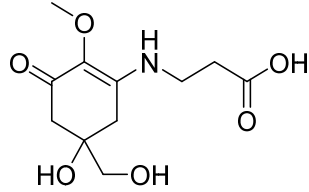<br><chem>O=C1CC(CO)(O)CC(NCCC(O)=O)=C1</chem>   | <u>260.1</u>                                 | Cnidaria                         | [85,86]    |
| Mycosporine-serinol<br>442866 | 310<br>27,270                                            | $C_{11}H_{19}NO_6$<br>261.12    | <br><chem>O=C1CC(CO)(O)CC(NC(CO)CO)=C1O</chem>   | 184, 194, 212.1,<br>216, 243.1, <u>262.1</u> | Fungi, Cyanobacteria             | [87,88]    |
| Mycosporine-GABA              | 310<br>28,900                                            | $C_{12}H_{20}NO_6$<br>273.12    | <br><chem>O=C1CC(CO)(O)CC(NCCCC(O)=O)=C1O</chem> | 87.1, 137.1, 186.2,<br><u>274.1</u>          | Cyanobacteria,<br>Dinoflagellata | [81,89,90] |

| Compound<br>Pubchem CID    | $\lambda_{\max}$ (nm)<br>$\epsilon$ ( $M^{-1}.cm^{-1}$ ) | Molecular Formula<br>Exact mass | Molecular structure<br>Smiles                                                                                                           | Fragments                                         | Phylum                             | Ref.       |
|----------------------------|----------------------------------------------------------|---------------------------------|-----------------------------------------------------------------------------------------------------------------------------------------|---------------------------------------------------|------------------------------------|------------|
| Mycosporine-serine         | 310<br>-                                                 | $C_{11}H_{17}NO_7$<br>275.10    | 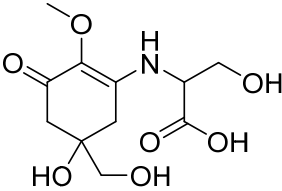<br><chem>O=C1CC(CO)(O)CC(NC(CO)=O)CO=C1OC</chem>    | <u>228, 236, 258,</u><br><u>276.1</u>             | Fungi                              | [91,92]    |
| Mycosporine-2<br>101324823 | 310<br>-                                                 | $C_{13}H_{19}NO_6$<br>285.12    | <br><chem>O=C1CC(CO)(O)CC(N2C(CO)CCC2=O)=C1OC</chem> | <u>286.1</u>                                      | Fungi                              | [93,94]    |
| Mycosporine-aurine         | 309<br>28,100                                            | $C_{10}H_{17}NO_7S$<br>295.07   | <br><chem>O=C1CC(O)(CO)CC(NCCS(=O)(O)=O)=C1OC</chem> | 57.1, 186.2, 236.1,<br>263.3, 277.2, <u>296.2</u> | Cnidaria,<br>Cyanobacteria, Lichen | [70,95-97] |

| Compound<br>Pubchem CID             | $\lambda_{\max}$ (nm)<br>$\epsilon$ ( $M^{-1}\cdot cm^{-1}$ ) | Molecular Formula<br>Exact mass | Molecular structure<br>Smiles                                                                                                              | Fragments                            | Phylum                          | Ref.      |
|-------------------------------------|---------------------------------------------------------------|---------------------------------|--------------------------------------------------------------------------------------------------------------------------------------------|--------------------------------------|---------------------------------|-----------|
| Normyosporine-glutamine             | 320<br>-                                                      | $C_{12}H_{18}N_2O_7$<br>302.11  | 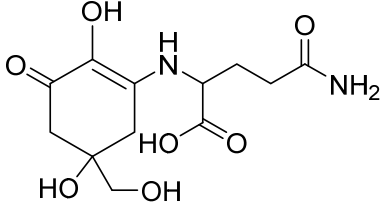<br><chem>OC1=C(NC(C(O)=O)CCC(N)=O)CC(CO)(O)CC1=O</chem> | <u>303.1</u>                         | Fungi                           | [92,98]   |
| Mycosporine-ornithine               | 310<br>-                                                      | $C_{13}H_{22}N_2O_6$<br>302.15  | <br><chem>O=C1CC(O)(CO)CC(NCCCC(C(O)=O)N)=C1OC</chem>    | 191.1, 235.2, 267.0,<br><u>303.2</u> | Cyanobacteria                   | [81,99]   |
| Mycosporine-glutaminol<br>101835613 | 310<br>12,542                                                 | $C_{13}H_{22}N_2O_6$<br>302.15  | <br><chem>O=C1CC(O)(CO)CC(NC(CO)CCC(N)=O)=C1OC</chem>   | 235, 267, 285,<br><u>303.2</u>       | Cyanobacteria, Fungi,<br>Lichen | [100–102] |



| Compound<br>Pubchem CID                    | $\lambda_{\max}$ (nm)<br>$\epsilon$ ( $M^{-1}.cm^{-1}$ ) | Molecular Formula<br>Exact mass | Molecular structure<br>Smiles                                                                                                                   | Fragments                                     | Phylum        | Ref.            |
|--------------------------------------------|----------------------------------------------------------|---------------------------------|-------------------------------------------------------------------------------------------------------------------------------------------------|-----------------------------------------------|---------------|-----------------|
| Normycosporine-glutamic acid<br>(artifact) | 320<br>-                                                 | $C_{12}H_{17}NO_8$<br>303.10    | 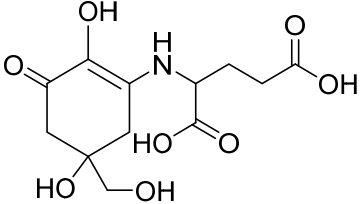<br><chem>OC1=C(NC(C(O)=O)CCC(O)=O)CC(O)(O)CC1=O</chem>       | <u>304.1</u>                                  | Fungi         | [98]            |
| Mycosporine-glutamicol<br>9882880          | 310<br>17,248                                            | $C_{13}H_{21}NO_7$<br>303.13    | <br><chem>O=C1CC(CO)(O)CC(NC(CO)CCC(O)=O)=O=C1OC</chem>       | 178, 210, 236, 258,<br>268, 286, <u>304.1</u> | Fungi, Lichen | [94,98,102,103] |
| Mycosporine-glutamine<br>101835612         | 310<br>-                                                 | $C_{13}H_{20}N_2O_7$<br>316.13  | <br><chem>O=C1CC(CO)(O)CC(NC(C(O)=O)CCC(N)=O)=O=C1OC</chem> | <u>317.1</u>                                  | Fungi         | [98]            |

| Compound<br>Pubchem CID                    | $\lambda_{\max}$ (nm)<br>$\epsilon$ ( $M^{-1}.cm^{-1}$ ) | Molecular Formula<br>Exact mass | Molecular structure<br>Smiles                             | Fragments                      | Phylum        | Ref.        |
|--------------------------------------------|----------------------------------------------------------|---------------------------------|-----------------------------------------------------------|--------------------------------|---------------|-------------|
| Mycosporine-lysine                         | 310<br>-                                                 | $C_{14}H_{24}N_2O_6$<br>316.16  | <br><chem>O=C1CC(CO)(O)CC(NCCCCC(N)C(O)=O)=C1OC</chem>    | 281.1, <u>317.2</u>            | Cyanobacteria | [99,104]    |
| Mycosporine-glutamic acid<br>102095611     | 311<br>20,900                                            | $C_{13}H_{19}NO_8$<br>317.11    | <br><chem>O=C1CC(CO)(O)CC(NC(C(O)=O)CCC(O)=O)=C1OC</chem> | 225, 281, 299,<br><u>318.1</u> | Fungi         | [78,98,105] |
| Mycosporine-hydroxyglutamicol<br>101805382 | 310<br>-                                                 | $C_{13}H_{21}NO_8$<br>319.13    | <br><chem>O=C1CC(CO)(O)CC(NC(O)C(O)CC(O)=O)=C1OC</chem>   | <u>320.1</u>                   | Lichen        | [103]       |

| Compound<br>Pubchem CID                   | $\lambda_{\max}$ (nm)<br>$\epsilon$ ( $M^{-1}.cm^{-1}$ ) | Molecular Formula<br>Exact mass | Molecular structure<br>Smiles                                                                                                                      | Fragments                                                    | Phylum                                                                                                                                                                                         | Ref.                |
|-------------------------------------------|----------------------------------------------------------|---------------------------------|----------------------------------------------------------------------------------------------------------------------------------------------------|--------------------------------------------------------------|------------------------------------------------------------------------------------------------------------------------------------------------------------------------------------------------|---------------------|
| Prasiolin<br>132581102                    | 324<br>12,393                                            | $C_{13}H_{19}NO_9$<br>333.11    | 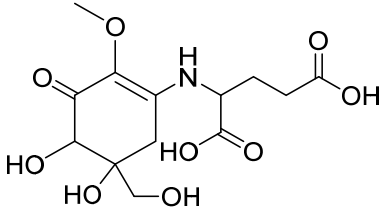<br><chem>O=C1C(O)C(CO)(O)CC(NC(CCC(O)=O)C(O)C(O)=O)=C1OC</chem> | <u>334.1</u>                                                 | Chlorophyta                                                                                                                                                                                    | [106]               |
| <b>Imino-mycosporines</b>                 |                                                          |                                 |                                                                                                                                                    |                                                              |                                                                                                                                                                                                |                     |
| Palythine<br>16047608                     | 320<br>35,500-36,200                                     | $C_{10}H_{16}N_2O_5$<br>244.11  | <br><chem>N=C1CC(CO)(O)CC(NCC(O)=O)=C1O</chem>                  | 137.2, 168.2, 185.9,<br>198.9, 209.2, 230.2,<br><u>245.1</u> | Arthropoda,<br>Bacillariophyta,<br>Chlorophyta,<br>Chordata, Cnidaria,<br>Dinoflagellata,<br>Echinodermata,<br>Lichen, Miozoa,<br>Mollusca, Ochrophyta,<br>Phaeophyta, Porifera,<br>Rhodophyta | [80-83,107-<br>110] |
| N-methylpalythine<br>= Aplysiapalythine C | 330<br>-                                                 | $C_{11}H_{18}N_2O_5$<br>258.12  | <br><chem>CNC1=C(OC)/C(CC(CO)(O)C1)=N/CC(O)=O</chem>          | <u>259.1</u>                                                 | Cyanobacteria,<br>Mollusca                                                                                                                                                                     | [81,111]            |

| Compound<br>Pubchem CID                  | $\lambda_{\max}$ (nm)<br>$\epsilon$ ( $M^{-1}.cm^{-1}$ ) | Molecular Formula<br>Exact mass | Molecular structure<br>Smiles                                                                                                            | Fragments              | Phylum               | Ref.         |
|------------------------------------------|----------------------------------------------------------|---------------------------------|------------------------------------------------------------------------------------------------------------------------------------------|------------------------|----------------------|--------------|
| Aplysiapalythine D                       | 330<br>-                                                 | $C_{11}H_{18}N_2O_5$<br>258.12  | 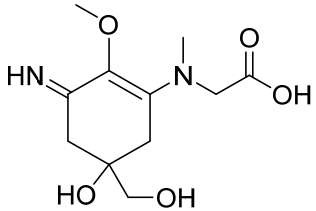<br><chem>N=C1CC(CO)(O)CC(N(C)CC(O)=O)=C1OC</chem>    | <u>259.1</u>           | Cyanobacteria        | [112]        |
| Dehydroxyl-usujirene                     | 356<br>-                                                 | $C_{13}H_{19}N_2O_4$<br>267.13  | <br><chem>N=C1CC(CO)(O)CC(N(C)CC(O)=O)=C1OC</chem><br>(a)                                                                                | 209, 224, <u>268.2</u> | Cyanobacteria        | [96]         |
| N-ethylpalythine<br>= Aplysiapalythine B | 332<br>-                                                 | $C_{12}H_{20}N_2O_5$<br>272.14  | <br><chem>OC(CC(NCC)=C/1OC)(CO)CC1=N/CC(O)=O</chem> | <u>273.1</u>           | Mollusca, Rhodophyta | [80,111,113] |

| Compound<br>Pubchem CID               | $\lambda_{\max}$ (nm)<br>$\epsilon$ ( $M^{-1}.cm^{-1}$ ) | Molecular Formula<br>Exact mass | Molecular structure<br>Smiles                           | Fragments                           | Phylum                     | Ref.         |
|---------------------------------------|----------------------------------------------------------|---------------------------------|---------------------------------------------------------|-------------------------------------|----------------------------|--------------|
| Palythine-serine                      | 320<br>10,500                                            | $C_{11}H_{18}N_2O_6$<br>274.12  | <br><chem>N=C1CC(CO)(O)CC(NC(CO)C(O)=O)=C1OC</chem>     | 260, <u>275.1</u>                   | Cnidaria,<br>Cyanobacteria | [81,114]     |
| Usujirene<br>(cis isomer)<br>15847474 | 357<br>-                                                 | $C_{13}H_{20}N_2O_5$<br>284.14  | <br><chem>OC(CC(N/C=C\C)=C/1OC)(CO)CC1=N/CC(O)=O</chem> | 197, 226, 241, 270,<br><u>285.1</u> | Rhodophyta                 | [80,115,116] |

| Compound<br>Pubchem CID                                                   | $\lambda_{\max}$ (nm)<br>$\epsilon$ ( $M^{-1}.cm^{-1}$ ) | Molecular Formula<br>Exact mass | Molecular structure<br>Smiles                                                                                                               | Fragments                                                    | Phylum                                                                                            | Ref.                   |
|---------------------------------------------------------------------------|----------------------------------------------------------|---------------------------------|---------------------------------------------------------------------------------------------------------------------------------------------|--------------------------------------------------------------|---------------------------------------------------------------------------------------------------|------------------------|
| Palythene<br>(trans isomer)<br>21773785                                   | 360<br>50,000                                            | $C_{13}H_{20}N_2O_5$<br>284.14  | 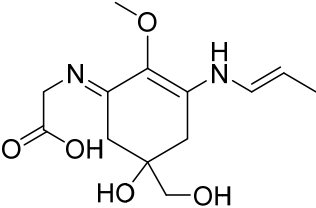<br><chem>OC(CC(N/C=C/C)=C/1OC)(CO)CC1=N/CC(O)=O</chem>  | 139.1, 185.0, 197.3,<br>205.0, 223.0, 241.2,<br><u>285.0</u> | Arthropoda,<br>Chlorophyta,<br>Cnidaria, Lichen,<br>Mollusca, Phaeophyta,<br>Porifera, Rhodophyta | [70,80,83,11<br>0,117] |
| Mycosporine<br>methylamine serine<br>= N-<br>methylmycosporine-<br>serine | 325<br>16,600                                            | $C_{12}H_{20}N_2O_6$<br>288.13  | <br><chem>OC(CC(NC(CO)C(O)=O)=C/1OC)(CO)CC1=N/C</chem>   | 274, <u>289.1</u>                                            | Cnidaria                                                                                          | [114]                  |
| Palythine-threonine                                                       | 320<br>-                                                 | $C_{12}H_{20}N_2O_6$<br>288.13  | <br><chem>N=C1CC(CO)(O)CC(NC(C(C)O)C(O)=O)=C1OC</chem> | 169, 172, 230, 245,<br>256, 274, <u>289.1</u>                | Cnidaria,<br>Cyanobacteria                                                                        | [81,118,119]           |

| Compound<br>Pubchem CID           | $\lambda_{\max}$ (nm)<br>$\epsilon$ ( $M^{-1}.cm^{-1}$ ) | Molecular Formula<br>Exact mass | Molecular structure<br>Smiles                                                                                                               | Fragments                                                         | Phylum                                                                                                                      | Ref.                       |
|-----------------------------------|----------------------------------------------------------|---------------------------------|---------------------------------------------------------------------------------------------------------------------------------------------|-------------------------------------------------------------------|-----------------------------------------------------------------------------------------------------------------------------|----------------------------|
| Asterina-330<br>13194807          | 330<br>43,800                                            | $C_{12}H_{20}N_2O_6$<br>288.13  | 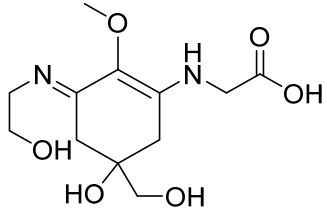<br><chem>OC(CC(NCC(O)=O)=C/1OC)(CO)CC1=N/CCO</chem>      | 137, 167.8, 186.0,<br>198.4, 230.2, 243.1,<br>273.1, <u>289.2</u> | Arthropoda,<br>Chlorophyta,<br>Chordata,<br>Echinodermata,<br>Lichen, Mollusca,<br>Ochrophyta,<br>Phaeophyta,<br>Rhodophyta | [70,80,82,11<br>1,120,121] |
| Mycosporine-2-glycine<br>23427657 | 334                                                      | $C_{12}H_{18}N_2O_7$<br>302.11  | <br><chem>OC(CC(NCC(O)=O)=C/1OC)(CO)CC1=N/CC(O)=O</chem>  | 151.1, 164.1, 185.1,<br>200.1, 244.1, 288.1,<br><u>303.1</u>      | Bacillariophyta,<br>Cnidaria,<br>Cyanobacteria,<br>Echinodermata,<br>Mollusca, Rhodophyta                                   | [80,95,122,1<br>23]        |
| Palythinol<br>9948334             | 332<br>43,500                                            | $C_{13}H_{22}N_2O_6$<br>302.15  | <br><chem>OC(CC(NCC(O)=O)=C/1OC)(CO)CC1=N/C(CO)C</chem> | 102.2, 150.0, 186.1,<br>199.2, 243.2, 288.0,<br><u>303.5</u>      | Chlorophyta, Lichen,<br>Phaeophyta, Porifera,<br>Rhodophyta                                                                 | [70,80,83,11<br>0,117]     |

| Compound<br>Pubchem CID                        | $\lambda_{\max}$ (nm)<br>$\epsilon$ ( $M^{-1}\cdot cm^{-1}$ ) | Molecular Formula<br>Exact mass | Molecular structure<br>Smiles                                                                                                                       | Fragments    | Phylum               | Ref.     |
|------------------------------------------------|---------------------------------------------------------------|---------------------------------|-----------------------------------------------------------------------------------------------------------------------------------------------------|--------------|----------------------|----------|
| Asterina-methyl ester                          | 330                                                           | $C_{13}H_{22}N_2O_6$<br>302.15  | 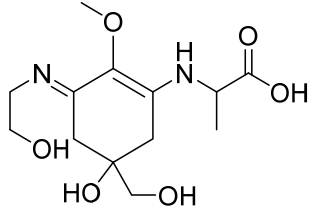<br><chem>OC(CC(NC(C)C(O)=O)=C/1OC)(CO)C<br/>C1=N/CCO</chem>     | <u>303.2</u> | Dinoflagellata       | [124]    |
| N-isopropanolpalythine<br>= Aplysiapalythine A | 332                                                           | $C_{13}H_{22}N_2O_6$<br>302.15  | <br><chem>OC(CC(NCC(O)=O)=C/1OC)(CO)CC1=<br/>N/CC(C)O</chem>      | <u>303.2</u> | Mollusca, Rhodophyta | [80,111] |
| Mycosporine-<br>methylamine-threonine          | 327<br>33,300                                                 | $C_{13}H_{22}N_2O_6$<br>302.15  | <br><chem>OC(CC(NC(C(C)O)C(O)=O)=C/1OC)(C<br/>O)CC1=N/C</chem> | <u>303.2</u> | Cnidaria, Rhodophyta | [80,125] |



| Compound<br>Pubchem CID                    | $\lambda_{\max}$ (nm)<br>$\epsilon$ ( $M^{-1}\cdot cm^{-1}$ ) | Molecular Formula<br>Exact mass | Molecular structure<br>Smiles                                                                                                                 | Fragments                           | Phylum                       | Ref.     |
|--------------------------------------------|---------------------------------------------------------------|---------------------------------|-----------------------------------------------------------------------------------------------------------------------------------------------|-------------------------------------|------------------------------|----------|
| Palythine-glutamine<br>= Bostrychine-A     | 322                                                           | $C_{13}H_{21}N_3O_6$<br>315.14  | 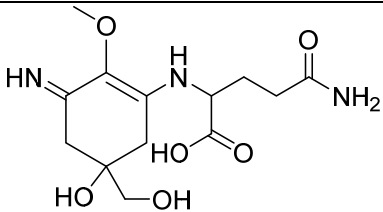<br><chem>N=C1CC(CO)(O)CC(NC(CO)=O)CCC(N)=O=C1OC</chem>     | <u>316.1</u>                        | Rhodophyta                   | [126]    |
| Palythine-glutamic acid<br>= Bostrychine-C | 322<br>22,351                                                 | $C_{13}H_{20}N_2O_7$<br>316.13  | <br><chem>N=C1CC(CO)(O)CC(NC(CO)=O)CCC(O)=O=C1OC</chem>     | <u>317.1</u>                        | Rhodophyta                   | [126]    |
| Mycosporine-glycine-alanine<br>102110164   | 333<br>-                                                      | $C_{13}H_{20}N_2O_7$<br>316.13  | <br><chem>OC(CC(NCC(O)=O)=C1OC)(CO)CC1=N/C(CO)=O)C</chem> | 186, 214, 258, 302,<br><u>317.1</u> | Cyanobacteria,<br>Rhodophyta | [80,127] |

| Compound<br>Pubchem CID               | $\lambda_{\max}$ (nm)<br>$\epsilon$ ( $M^{-1}.cm^{-1}$ ) | Molecular Formula<br>Exact mass | Molecular structure<br>Smiles                                                                                                                      | Fragments                                                  | Phylum                                  | Ref.        |
|---------------------------------------|----------------------------------------------------------|---------------------------------|----------------------------------------------------------------------------------------------------------------------------------------------------|------------------------------------------------------------|-----------------------------------------|-------------|
| Palythenic acid<br>101016648          | 337<br>29,200                                            | $C_{14}H_{20}N_2O_7$<br>328.13  | 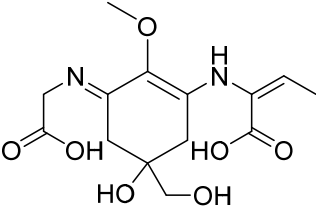<br><chem>OC(CC(N/C(C(O)=O)=C/C)=C/1OC)(CO)CC1=N/CC(O)=O</chem> | 138, 193, 197, 205,<br>237, 268, 283, 296,<br><u>329.1</u> | Dinoflagellata,<br>Mollusca, Rhodophyta | [80,81,110] |
| Euhalothece-362<br>102182144          | 362<br>-                                                 | $C_{14}H_{22}N_2O_7$<br>330.14  | <br><chem>OC(CC(NC(C)C(O)=O)=C/1OC)(CO)C1=N/C=C(CO)/O</chem>     | 213.1, 228.1, 242.1,<br>272.1, 316.1, <u>331.1</u>         | Cyanobacteria                           | [122,128]   |
| Mycosporine-glutamicol<br>ethyl ester | 310<br>21,295                                            | $C_{15}H_{25}NO_7$<br>331.16    | <br><chem>O=C1CC(CO)(O)CC(NC(CO)CCC(OC)C)=O=C1OC</chem>        | 218, 264, 286, 314,<br><u>332.2</u>                        | Fungi, Lichen                           | [102]       |

| Compound<br>Pubchem CID                     | $\lambda_{\max}$ (nm)<br>$\epsilon$ ( $M^{-1}\cdot cm^{-1}$ ) | Molecular Formula<br>Exact mass | Molecular structure<br>Smiles                                                                                                                        | Fragments                                                           | Phylum                                                                                                                                                                                 | Ref.                   |
|---------------------------------------------|---------------------------------------------------------------|---------------------------------|------------------------------------------------------------------------------------------------------------------------------------------------------|---------------------------------------------------------------------|----------------------------------------------------------------------------------------------------------------------------------------------------------------------------------------|------------------------|
| Shinorine<br>101926676                      | 334<br>44,668                                                 | $C_{13}H_{20}N_2O_8$<br>332.12  | 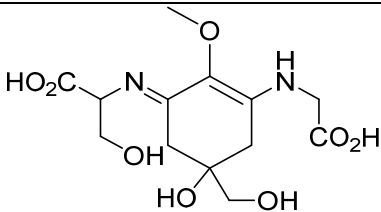<br><chem>OC(CC(NCC(O)=O)=C/1OC)(CO)CC1=N/C(C(O)=O)CO</chem>       | 137.1, 186.2, 230.0,<br>241.3, 255.0,<br>298.0, <u>333.3</u>        | Arthropoda,<br>Bacillariophyta,<br>Chlorophyta,<br>Chordata,<br>Cyanobacteria,<br>Dinoflagellata, Lichen,<br>Miozoa, Mollusca,<br>Ochrophyta,<br>Phaeophyta, Porifera,<br>Rhodophyta   | [70,80–<br>83,110,129] |
| Mycosporine-glycine-<br>valine<br>101016647 | 335                                                           | $C_{15}H_{24}N_2O_7$<br>344.16  | <br><chem>OC(CC(NCC(O)=O)=C/1OC)(CO)CC1=N/C(C(O)=O)C(C)C</chem>    | 116.0, 118.1, 130.6,<br>183.9, 198.1, 268.2,<br>295.0, <u>313.0</u> | Arthropoda, Cnidaria,<br>Chordata,<br>Echinodermata,<br>Lichen, Mollusca,<br>Porifera                                                                                                  | [70,83]                |
| Porphyra-334<br>91864535                    | 334<br>42,300                                                 | $C_{14}H_{22}N_2O_8$<br>346.14  | <br><chem>OC(CC(NC(C(O)C)C(O)=O)=C/1OC)(C(O)CC1=N/CC(O)=O</chem> | 137, 151, 168, 186,<br>227, 243, 288, 303,<br>332, <u>347.1</u>     | Arthropoda,<br>Bacillariophyta,<br>Chlorophyta,<br>Chordata, Cnidaria,<br>Cyanobacteria,<br>Dinoflagellata,<br>Miozoa, Mollusca,<br>Ochrophyta,<br>Phaeophyta, Porifera,<br>Rhodophyta | [80–<br>83,110,130]    |

| Compound<br>Pubchem CID                                             | $\lambda_{\max}$ (nm)<br>$\epsilon$ ( $M^{-1}.cm^{-1}$ ) | Molecular Formula<br>Exact mass | Molecular structure<br>Smiles                                                                                                                         | Fragments                                | Phylum         | Ref.  |
|---------------------------------------------------------------------|----------------------------------------------------------|---------------------------------|-------------------------------------------------------------------------------------------------------------------------------------------------------|------------------------------------------|----------------|-------|
| Mycosporine-serine-glycine methyl ester<br>= Shinorine methyl ester | 332<br>-                                                 | $C_{14}H_{22}N_2O_8$<br>346.14  | 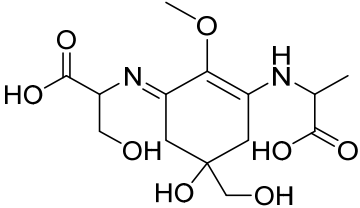<br><chem>OC(CC(NC(C)C(O)=O)=C/1OC)(CO)C1=N/C(C(O)=O)CO</chem>      | 244, 269, 288, 314,<br>332, <u>347.3</u> | Dinoflagellata | [131] |
| Palythine-serine-sulfate                                            | 321<br>-                                                 | $C_{11}H_{18}N_2O_9S$<br>354.07 | <br><chem>N=C1CC(CS(=O)(OO)=O)(O)CC(NC(CO)C(O)=O)=C1OC</chem>      | <u>355.1</u>                             | Cnidaria       | [120] |
| Mycosporine-glycine - aspartic acid                                 | 333<br>-                                                 | $C_{14}H_{20}N_2O_9$<br>360.12  | <br><chem>OC(CC(NC(CC(O)=O)C(O)=O)=C/1OC)(CO)CC1=N/CC(O)=O</chem> | <u>361.1</u>                             | Arthropoda     | [75]  |

| Compound<br>Pubchem CID                                       | $\lambda_{\max}$ (nm)<br>$\epsilon$ ( $M^{-1}.cm^{-1}$ ) | Molecular Formula<br>Exact mass | Molecular structure<br>Smiles                                                                                                                          | Fragments                                                           | Phylum                          | Ref.         |
|---------------------------------------------------------------|----------------------------------------------------------|---------------------------------|--------------------------------------------------------------------------------------------------------------------------------------------------------|---------------------------------------------------------------------|---------------------------------|--------------|
| Mycosporine-threonine-<br>$\beta$ -alanine<br>= Bostrychine-F | 332<br>44,994                                            | $C_{15}H_{24}N_2O_8$<br>360.15  | 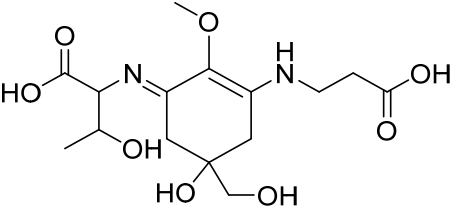<br><chem>OC(CC(NCCC(O)=O)=C/1OC)(CO)CC1=N/C(C(C)O)C(O)=O</chem>     | <u>361.2</u>                                                        | Rhodophyta                      | [126]        |
| Palythine-threonine-<br>sulfate                               | 321<br>-                                                 | $C_{12}H_{20}N_2O_9S$<br>368.09 | <br><chem>N=C1CC(CS(=O)(OO)=O)(O)CC(NC(C(C)O)C(O)=O)=C1OC</chem>    | <u>369.1</u>                                                        | Cnidaria                        | [120]        |
| Mycosporine-glycine -<br>glutamic acid<br>102446627           | 330<br>43,900                                            | $C_{15}H_{22}N_2O_9$<br>374.13  | <br><chem>OC(CC(NC(CCC(O)=O)C(O)=O)=C/1OC)(CO)CC1=N/CC(O)=O</chem> | 118.2, 176.0, 192.2,<br>228.3, 258.1, 297.1,<br>331.2, <u>375.3</u> | Cnidaria, Lichen,<br>Rhodophyta | [70,126,132] |

| Compound<br>Pubchem CID                                    | $\lambda_{\max}$ (nm)<br>$\epsilon$ ( $M^{-1}\cdot cm^{-1}$ ) | Molecular Formula<br>Exact mass | Molecular structure<br>Smiles                                                                                                                       | Fragments    | Phylum        | Ref.     |
|------------------------------------------------------------|---------------------------------------------------------------|---------------------------------|-----------------------------------------------------------------------------------------------------------------------------------------------------|--------------|---------------|----------|
| Mycosporine-<br>threanine-glutamic acid<br>= Bostrychine-E | 333<br>21,618                                                 | $C_{16}H_{26}N_2O_8$<br>374.17  | 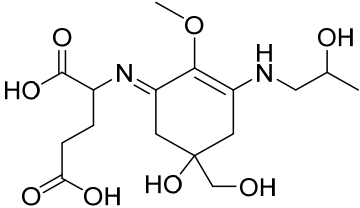<br><chem>OC(CC(NCC(O)C)=C/1OC)(CO)CC1=N/C(CCC(O)=O)C(O)=O</chem> | <u>375.2</u> | Rhodophyta    | [126]    |
| Catenelline                                                | 320<br>-                                                      | $C_{13}H_{22}N_2O_9S$<br>382.10 | <br><chem>OC(CC(NCCS(O)(=O)=O)=C/1OC)(CO)CC1=N/C(C(O)=O)CO</chem> | <u>383.1</u> | Rhodophyta    | [80,133] |
| M-343                                                      | 343<br>-                                                      | -<br>386                        | -                                                                                                                                                   | <u>387</u>   | Cyanobacteria | [96]     |

| Compound<br>Pubchem CID                                | $\lambda_{\max}$ (nm)<br>$\epsilon$ ( $M^{-1}\cdot cm^{-1}$ ) | Molecular Formula<br>Exact mass   | Molecular structure<br>Smiles                                                                                                                             | Fragments    | Phylum     | Ref.  |
|--------------------------------------------------------|---------------------------------------------------------------|-----------------------------------|-----------------------------------------------------------------------------------------------------------------------------------------------------------|--------------|------------|-------|
| Mycosporine-threonine-glutamine<br>= Bostrychine-B     | 335<br>36,155                                                 | $C_{17}H_{27}N_3O_9$<br>417.17    | 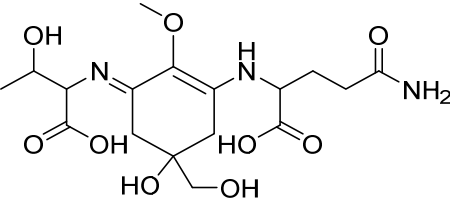<br><chem>OC(CC(NC(C(O)=O)CCC(N)=O)=C1OC(CO)CC1=N/C(C(O)=O)C(O)C</chem> | <u>418.2</u> | Rhodophyta | [126] |
| Mycosporine-threonine-glutamic acid<br>= Bostrychine-D | 337<br>31,956                                                 | $C_{17}H_{26}N_2O_{10}$<br>418.16 | <br><chem>OC(CC(NC(C(O)=O)CCC(O)=O)=C1OC(CO)CC1=N/C(C(O)=O)C(O)C</chem> | <u>419.1</u> | Rhodophyta | [126] |
| <b>Glycosylated Oxo-mycosporines</b>                   |                                                               |                                   |                                                                                                                                                           |              |            |       |
| Klebsormidin B                                         | 324<br>-                                                      | $C_{12}H_{19}NO_8$<br>305.11      | <br><chem>O=C1C(O)C(O)(CO)CC(N(C)C(C(O)=O)CO)=C1OC</chem>            | <u>306.1</u> | Charophyta | [134] |

| Compound<br>Pubchem CID | $\lambda_{\max}$ (nm)<br>$\epsilon$ ( $M^{-1}\cdot cm^{-1}$ ) | Molecular Formula<br>Exact mass | Molecular structure<br>Smiles                                                                                                                                  | Fragments    | Phylum     | Ref.  |
|-------------------------|---------------------------------------------------------------|---------------------------------|----------------------------------------------------------------------------------------------------------------------------------------------------------------|--------------|------------|-------|
| Klebsormidin A          | 324<br>-                                                      | $C_{18}H_{29}NO_{13}$<br>467.16 | 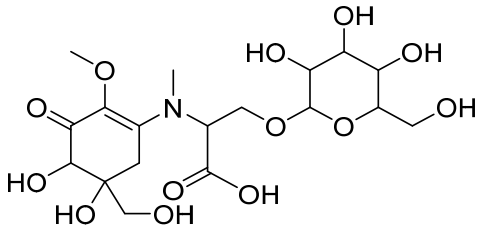<br><chem>O=C1C(O)C(O)(CO)CC(N(C)C(C(O)=O)COC2OC(CO)C(O)C(O)C2O)=C1OC</chem> | <u>468.2</u> | Charophyta | [134] |

#### Glycosylated Imino-mycosporines

|                         |          |                                   |                                                                                                                                                           |                                                                                   |               |          |
|-------------------------|----------|-----------------------------------|-----------------------------------------------------------------------------------------------------------------------------------------------------------|-----------------------------------------------------------------------------------|---------------|----------|
| Hexose-palythine-serine | 320<br>- | $C_{17}H_{28}N_2O_{11}$<br>436.17 | 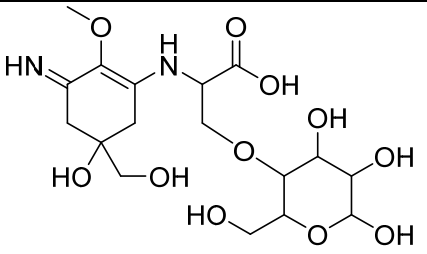<br><chem>N=C1CC(O)(CO)CC(NC(COC2C(CO)OC(O)C(O)C2O)C(O)=O)=C1OC</chem> | 142, 171, 207, 239,<br>241, 245, 257, 275,<br>378, 391, 407, 422,<br><u>437.2</u> | Cyanobacteria | [81,135] |
|-------------------------|----------|-----------------------------------|-----------------------------------------------------------------------------------------------------------------------------------------------------------|-----------------------------------------------------------------------------------|---------------|----------|



| Compound<br>Pubchem CID             | $\lambda_{\max}$ (nm)<br>$\epsilon$ ( $M^{-1}.cm^{-1}$ ) | Molecular Formula<br>Exact mass   | Molecular structure<br>Smiles                                                                                                                                                                                                                                                                                                                                                                                                   | Fragments                                   | Phylum        | Ref.     |
|-------------------------------------|----------------------------------------------------------|-----------------------------------|---------------------------------------------------------------------------------------------------------------------------------------------------------------------------------------------------------------------------------------------------------------------------------------------------------------------------------------------------------------------------------------------------------------------------------|---------------------------------------------|---------------|----------|
| Hexose-bound<br>palythine-threonine | 322<br>-                                                 | $C_{18}H_{30}N_2O_{11}$<br>450.18 | 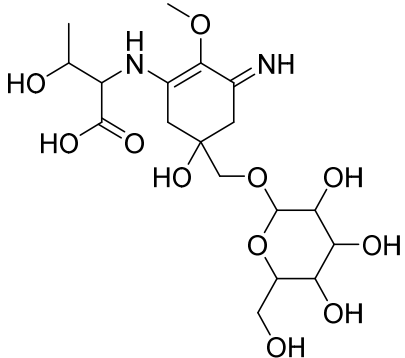 <p>The structure shows a central palythine core (a 6-membered ring with a methoxy group, a double bond, and two NH groups). It is substituted with a threonine residue (a 4-hydroxy-2-methylpentanoic acid derivative) and a hexose sugar (a 6-membered ring with four hydroxyl groups and a hydroxymethyl group at the C1 position).</p>    | 185.2, 289.2, 349.2,<br>389.2, <u>407.2</u> | Cyanobacteria | [81,119] |
| Pentose-bound<br>shinorine          | 332<br>-                                                 | $C_{18}H_{28}N_2O_{12}$<br>464.16 |  <p>The structure shows a central palythine core (a 6-membered ring with a methoxy group, a double bond, and two NH groups). It is substituted with a threonine residue (a 4-hydroxy-2-methylpentanoic acid derivative) and a pentose sugar (a 5-membered ring with three hydroxyl groups and a hydroxymethyl group at the C1 position).</p> | 211.3, 333.3, 377.1,<br>421.1, <u>465.1</u> | Cyanobacteria | [89]     |

OC(CC(NC(C(O)=O)C(C)O)=C1OC)(C  
OC2OC(CO)C(O)C(O)C2O)CC1=N

OC(C/1)(COC2OC(CO)C(O)C2O)CC(  
NC(C(O)=O)CO)=C(OC)C1=N\ CC(O)  
=O

| Compound<br>Pubchem CID                         | $\lambda_{\max}$ (nm)<br>$\epsilon$ ( $M^{-1}.cm^{-1}$ ) | Molecular Formula<br>Exact mass   | Molecular structure<br>Smiles                                                                                                                                                                                                                                                                                                                                                                                                                                                                 | Fragments                      | Phylum | Ref.         |
|-------------------------------------------------|----------------------------------------------------------|-----------------------------------|-----------------------------------------------------------------------------------------------------------------------------------------------------------------------------------------------------------------------------------------------------------------------------------------------------------------------------------------------------------------------------------------------------------------------------------------------------------------------------------------------|--------------------------------|--------|--------------|
| Mycosporine-<br>glutaminol- <i>O</i> -glucoside | 310<br>25,000                                            | $C_{19}H_{32}N_2O_{11}$<br>464.20 | 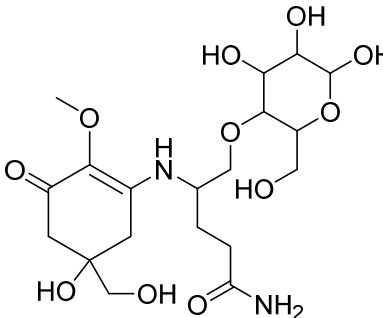 <p>The structure shows a mycosporine core (a bicyclic system with a methoxy group, a ketone, and two hydroxyl groups) linked via an amide bond to a glutaminol chain. The glutaminol chain is further linked via an ether bond to a glucose molecule. The glucose molecule has hydroxyl groups at the 2, 3, and 6 positions.</p> <chem>OC(C/1)(COC2OC(CO)C(O)C2O)CC(NC(C(O)=O)CO)=C(OC)C1=N\CC(O)=O</chem> | 303, 428, 446,<br><u>465.0</u> | Fungi  | [98,136,137] |
| Mycosporine-<br>glutamicol- <i>O</i> -glucoside | 310<br>25,000                                            | $C_{19}H_{31}NO_{12}$<br>465.18   |  <p>The structure shows a mycosporine core (a bicyclic system with a methoxy group, a ketone, and two hydroxyl groups) linked via an amide bond to a glutamicol chain. The glutamicol chain is further linked via an ether bond to a glucose molecule. The glucose molecule has hydroxyl groups at the 2, 3, and 6 positions.</p> <chem>O=C1CC(CO)(O)CC(NCC(COC2C(O)C(O)C(O)OC2CO)CC(O)=O)=C1OC</chem>     | 304, <u>466.2</u>              | Fungi  | [137,138]    |

| Compound<br>Pubchem CID                          | $\lambda_{\max}$ (nm)<br>$\epsilon$ ( $M^{-1}.cm^{-1}$ ) | Molecular Formula<br>Exact mass   | Molecular structure<br>Smiles                                                                                                                                                                                                                                                                                                                                                                                             | Fragments                                                                              | Phylum        | Ref.  |
|--------------------------------------------------|----------------------------------------------------------|-----------------------------------|---------------------------------------------------------------------------------------------------------------------------------------------------------------------------------------------------------------------------------------------------------------------------------------------------------------------------------------------------------------------------------------------------------------------------|----------------------------------------------------------------------------------------|---------------|-------|
| Arabinose-bound<br>porphyrin-334<br>= 478 Da MAA | 335<br>33,200                                            | $C_{19}H_{30}N_2O_{12}$<br>478.18 | 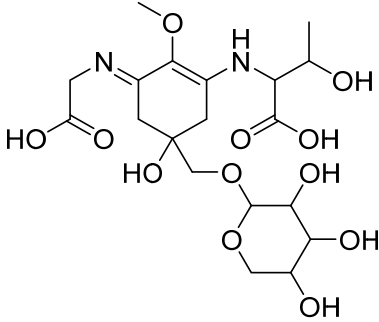 <p>The structure shows a central porphyrin ring with a methoxy group at the 3-position and a methyl group at the 4-position. The 2-position is substituted with a propionic acid side chain, and the 5-position is substituted with a propionamide side chain. The propionamide side chain is linked to an arabinose sugar moiety.</p> | 214.8, 273.0, 377.1,<br>435.1, 437.1, <u>479.2</u>                                     | Cyanobacteria | [139] |
| Hexose-shinorine                                 | 333<br>-                                                 | $C_{19}H_{30}N_2O_{13}$<br>494.17 |  <p>The structure shows a central porphyrin ring with a methoxy group at the 3-position and a methyl group at the 4-position. The 2-position is substituted with a propionic acid side chain, and the 5-position is substituted with a propionamide side chain. The propionamide side chain is linked to a hexose sugar moiety.</p>    | 186, 230, 265, 274,<br>287, 300, 303, 318,<br>333, 392, 436, 365,<br>480, <u>495.2</u> | Cyanobacteria | [135] |

| Compound<br>Pubchem CID                      | $\lambda_{\max}$ (nm)<br>$\epsilon$ ( $M^{-1}.cm^{-1}$ ) | Molecular Formula<br>Exact mass   | Molecular structure<br>Smiles                                                                                                                                                     | Fragments                                                          | Phylum        | Ref.     |
|----------------------------------------------|----------------------------------------------------------|-----------------------------------|-----------------------------------------------------------------------------------------------------------------------------------------------------------------------------------|--------------------------------------------------------------------|---------------|----------|
| Collemin A<br>10074531                       | 311<br>34,000                                            | $C_{19}H_{32}N_2O_{13}$<br>496.19 | 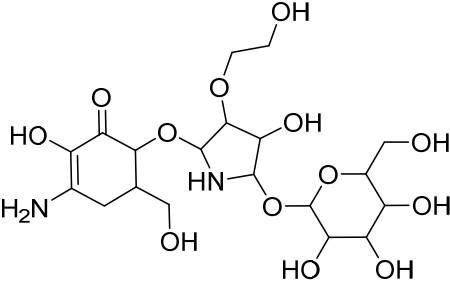<br><chem>OC(C(C(C(CO)O1)O)O)C1OC(C2O)N<br/>C(OC3C(C(O)=C(N)CC3CO)=O)C2OC<br/>CO</chem>         | 95.0, 198.1, 235.8,<br>300.2, 340.2, 409.1,<br>435.0, <u>497.2</u> | Lichen        | [70,140] |
| 13-O-( $\beta$ -galactosyl)-<br>porphyra-334 | 334<br>-                                                 | $C_{20}H_{32}N_2O_{13}$<br>508.19 | <br><chem>OC(C/1)(CO)CC(NCC(O)=O)=C(OC)C<br/>1=N\C(C(O)=O)C(OC2OC(CO)C(O)C(<br/>O)C2O)C</chem> | 347.1, <u>509.2</u>                                                | Cyanobacteria | [141]    |

| Compound<br>Pubchem CID       | $\lambda_{\max}$ (nm)<br>$\epsilon$ ( $M^{-1}.cm^{-1}$ ) | Molecular Formula<br>Exact mass   | Molecular structure<br>Smiles                                                                                                                                                                                                                                                                                                                                                                                                                                                                        | Fragments                                                           | Phylum        | Ref.  |
|-------------------------------|----------------------------------------------------------|-----------------------------------|------------------------------------------------------------------------------------------------------------------------------------------------------------------------------------------------------------------------------------------------------------------------------------------------------------------------------------------------------------------------------------------------------------------------------------------------------------------------------------------------------|---------------------------------------------------------------------|---------------|-------|
| Hexose-bound<br>porphyrin-334 | 334<br>36,300                                            | $C_{20}H_{32}N_2O_{13}$<br>508.19 | 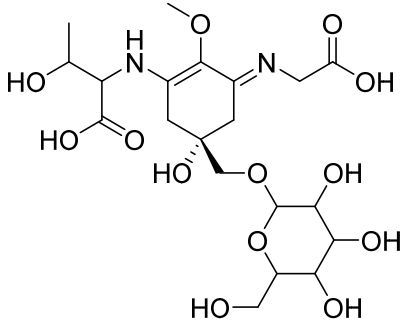 <p>The structure shows a central porphyrin ring with a methyl group at the 3-position, a methyl ester at the 4-position, and a propionic acid side chain at the 5-position. It is linked via a glycosidic bond to a hexose sugar.</p> <chem>O[C@@](CC(NC(C(O)=O)C(C)O)=C1OC(C)(COC2OC(CO)C(O)C(O)C2O)CC1=N/CC(O)=O</chem>                                                                                         | 303.2, 347.2, 361.2,<br>421.2, 465.2, <u>509.2</u>                  | Cyanobacteria | [119] |
| 586-Da MAA                    | 332<br>-                                                 | $C_{26}H_{42}N_4O_{11}$<br>586.29 |  <p>The structure features a central porphyrin ring with a methyl group at the 3-position, a methyl ester at the 4-position, and a propionic acid side chain at the 5-position. It is linked via two propyl chains to two additional porphyrin-like structures, one of which has a methyl group and a methyl ester.</p> <chem>OC(C1)(CO)CC(NCCCC(C(O)=O)NC2=C(OC)C(CC(CO)(O)C2)=O)=C(OC)C1=N\CCCC(N)C(O)=O</chem> | 417.2, 428.2, 472.2,<br>499.3, 525.3, 543.3,<br>569.4, <u>587.3</u> | Cyanobacteria | [142] |

| Compound<br>Pubchem CID                          | $\lambda_{\max}$ (nm)<br>$\epsilon$ ( $M^{-1}.cm^{-1}$ ) | Molecular Formula<br>Exact mass   | Molecular structure<br>Smiles                                                                                                                                                                      | Fragments                                                           | Phylum        | Ref.  |
|--------------------------------------------------|----------------------------------------------------------|-----------------------------------|----------------------------------------------------------------------------------------------------------------------------------------------------------------------------------------------------|---------------------------------------------------------------------|---------------|-------|
| Glycosylated Palythine-threonine<br>= 612-Da MAA | 324<br>28,200                                            | $C_{24}H_{40}N_2O_{16}$<br>612.24 | 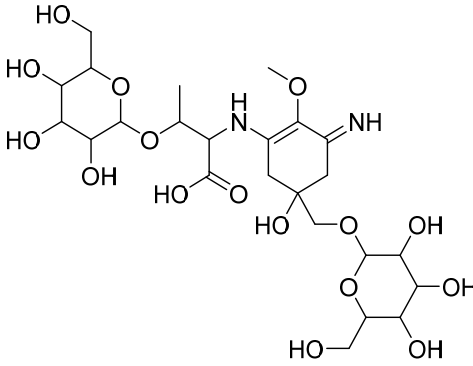 <p>OC(CC(NC(C(O)=O)C(C)OC1OC(CO)C(O)C(O)C1O)=C2OC)(COC3OC(CO)C(O)C(O)C3O)CC2=N</p>                              | 187.2, 289.2, 349.1,<br>389.2, 407.2, 451.2,<br>569.2, <u>613.2</u> | Cyanobacteria | [119] |
| Nostoc-756<br>= 756-Da MAA<br>146683732          | 313<br>-                                                 | $C_{34}H_{52}N_4O_{15}$<br>756.34 |  <p>OC(C/1)(CO)CC(NCCCC(C(O)=O)NC2=C(OC)C(CC(CO)(O)C2)=O)=C(OC)C1=N \ CCCC(NC3=C(OC)C(CC(CO)(O)C3)=O)C(O)=O</p> | 454.1, 516.1, 552.1,<br>603.1, 639.1, 657.1,<br>694.9, <u>757.2</u> | Cyanobacteria | [142] |

| Compound<br>Pubchem CID | $\lambda_{\max}$ (nm)<br>$\epsilon$ ( $M^{-1}.cm^{-1}$ ) | Molecular Formula<br>Exact mass    | Molecular structure<br>Smiles                                                                                                                                                                                      | Fragments                                                                      | Phylum        | Ref.  |
|-------------------------|----------------------------------------------------------|------------------------------------|--------------------------------------------------------------------------------------------------------------------------------------------------------------------------------------------------------------------|--------------------------------------------------------------------------------|---------------|-------|
| 880-Da MAA              | 331<br>49,800                                            | $C_{37}H_{60}N_4O_{20}$<br>880.38  | 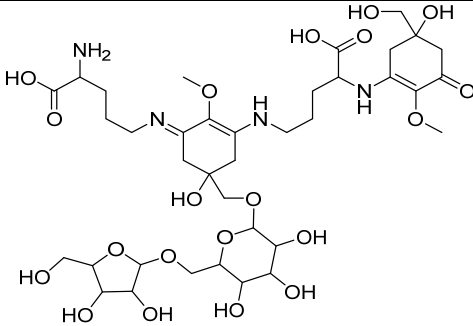<br><chem>OC(C1)(COC2OC(COC3OC(CO)C(O)C3O)C(O)C(O)C2O)CC(NCCCC(C(O)=O)NC4=C(OC)C(CC(CO)(O)C4)=O)=C(OC)C1=N\CCCC(N)C(O)=O</chem>  | 445.3, 489.3, 533.3,<br>737.4, 795.5, 837.5,<br><u>881.4</u>                   | Cyanobacteria | [89]  |
| 1050-Da MAA             | 312/ 340<br>58,800                                       | $C_{45}H_{70}N_4O_{24}$<br>1050.44 | <br><chem>OC(C1)(COC2OC(COC3OC(CO)C(O)C3O)C(O)C(O)C2O)CC(NCCCC(C(O)=O)NC4=C(OC)C(CC(CO)(O)C4)=O)=C(OC)C1=N\CCCC(N)C(O)=O</chem> | 410.4, 437.1, 481.1,<br>501.0, 581.9, 722.3,<br>766.3, 963.4,<br><u>1051.4</u> | Cyanobacteria | [139] |

| Compound<br>Pubchem CID | $\lambda_{\max}$ (nm)<br>$\epsilon$ ( $M^{-1}\cdot cm^{-1}$ ) | Molecular Formula<br>Exact mass | Molecular structure<br>Smiles                                                              | Fragments | Phylum | Ref. |
|-------------------------|---------------------------------------------------------------|---------------------------------|--------------------------------------------------------------------------------------------|-----------|--------|------|
|                         |                                                               |                                 | <chem>=O)NC4=C(OC)C(CC(CO)(O)C4)=O)=C(OC)C1=N\CCCC(NC5=C(OC)C(CC(CO)(O)C5)=O)C(O)=O</chem> |           |        |      |

<sup>1</sup> Ref: References. <sup>a</sup> although the correct molecular weight for dehidrousujerene is  $C_{13}H_{20}N_2O_4$  (MW = 268.31) and  $[M+H]^+$  might be  $m/z = 269$ , according to nitrogen rules and ionization in positive mode in ESI.

## References

- [1] E. Nakamura, J. Kobayashi, R. Abe, Mycosporine-Like Amino Acid, JPS59137450, 1984.
- [2] G. Bird, N. Fitzmaurice, W.C. Dunlap, W.M. Chalker, B E Bandaranayake, Sunscreen compositions and compounds for use therein, International patent application PCT/AU87/00330, publication no. WO 88/02251. Australian patent 595075., 1987.
- [3] G. Bird, N. Fitzmaurice, W.C. Dunlap, B.E. Chalker, W.M. Bandaranayake, Sunscreen compositions and compounds for use therein, (1991).
- [4] P.J. Chalmers, N. Fitzmaurice, D.J. Rigg, S.H. Thang, G. Bird, UV-absorbing compounds and compositions, International patent application PCT/AU90/00078, publication no. WO90/09995. Australian patent 653495., 1990.
- [5] M. Krol, N. HUNAR, A. Ivanov, F. Sarhan, Solar radiation protection composition, WO2000024369, 2000.
- [6] N. Huner, A. Ivanov, M. Krol, F. Sarhan, Solar radiation protection composition, EP1123083A1, 2001.
- [7] N. Huner, M. Krol, A. Ivanov, F. Sarhan, Solar radiation protection composition, US6787147, 2004.
- [8] G. Andre, M. Pellegrini, L. Pellegrini, Algal extracts containing amino acid analogs of mycosporin are useful as dermatological protecting agents against ultraviolet radiation, FR2803201A1, 2001.



- [9] D.C. Enk, M. Srebnik, O. Lev, M. Hochberg, I. Dor, A. Torres-Kerner, V. Dembitsky, Utilization of natural pigments from lichens, cyanobacteria, fungi and plants for sun protection, US20050129630A1, 2001.
- [10] D.C. Enk, M. Srebnik, O. Lev, M. Hochberg, I. Dor, A. Torres-Kerner, V.M. Dembitsky, Utilization of natural pigments from lichens, cyanobacteria, fungi and plants for sun protection, WO2003020236, 2002.
- [11] V.M. Dembitsky, I. Dor, D.C. Enk, M. Hochberg, O. Lev, M. Srebnik, A. Torres-Kerner, Utilization of natural pigments from lichens, cyanobacteria, fungi and plants for sun protection, AU2002329025A1, 2002.
- [12] V.M. Dembitsky, I. Dor, D.C. Enk, M. Hochberg, O. Lev, M. Srebnik, A. Torres-Kerner, Utilization of natural pigments from lichens, cyanobacteria, fungi and plants for sun protection, EP1424990A2, 2002.
- [13] J.C. Sirop, R.D. Pradines, Topical cosmetic composition, useful for protecting skin and hair against sunlight, contains an extract from the red alga *Polysiphonia lanosa*, FR2803200, 2001.
- [14] C. Llewellyn, E. Galley, Personal care compositions, WO2002039974A1, 2003.
- [15] C. Llewellyn, E. Galley, Personal care compositions, EP1341514A1, 2002.
- [16] D.C. Enk, M. Hochberg, A. Torres, O. Lev, I. Dor, V.M. Dembitsky, M. Srebnik, Natural UV filters derived from pigments of lichens, IL0200725, 2002.
- [17] N. Fujitani, M. Hori, N. Kobayashi, H. Takenaka, Y. Yamaguchi, A. Yokoyama, Extract having antioxidant activity and ultraviolet-absorbing activity, external preparation for skin, and food, JP2004238519A, 2003.
- [18] D. Schmid, C. Schürch, F.D. Züllli, Cosmetic skin care products and cosmetic agents for protecting skin against premature aging, EP1473028, 2004.
- [19] B. Banowski, D. Hoffmann, A. Wadle, P. Siegert, A. Saettler, T. Gerke, Beta-glucuronidase inhibitors for use in deodorants and antiperspirants, US20040234466, 2004.
- [20] W. Baschong, Amino-benzophenone UV filter formulations for the prevention of tanning, GB2412866, 2005.

- [21] A.J. Aguilera, L.C.L.F. De, F.F. Lopez, Use of a mycosporin-type amino acid (porphyra 334) as an antioxidant, WO2007026035, 2005.
- [22] J.A. Arjona, F.D.L.C. Luque, F.L. Figueroa, Use of a mycosporin-type amino acid (porphyra 334) as an antioxidant, ES2301293, 2005.
- [23] F.D.L.C. Luque, J.A. ARJONA, F.L. FIGUEROA, Use of a mycosporin-type amino acid (shinorine) as an antioxidant, WO2007026038, 2005.
- [24] J.A. Arjona, F.D.L.C. Luquea, F.L. Figueroa, Use of a mycosporin-type amino acid (shinorine) as an antioxidant, ES2301426, 2005.
- [25] J.A. Arjona, F.D.L.C. Luque, F.L. Figueroa, Use of a mixture of mycosporin-type amino acids (asterin 330 + palythine) as an antioxidant, WO2007026037, 2005.
- [26] A.J. Aguilera, L.C.L.F. De, F.F. Lopez, Use of a mycosporin-type amino acid (m-gly) as an antioxidant, WO2007026036A3, 2006.
- [27] H.S. Ewart, J. Zhang, J.C. Barrow, Compositions comprising porphyra and methods of making and using thereof, WO2007144779, 2007.
- [28] H.S. Ewart, J. Zhang, J.C. Barrow, Compositions comprising porphyra and methods of making and using thereof, EP2001311, 2007.
- [29] H. Ewart, J. Zhang, C. Barrow, Compositions comprising Porphyra and methods of making and using thereof, US20070220806, 2006.
- [30] J.A. Arjona, F.D.L.C. Luque, N.K. Peinado, F.L. Figueroa, Composition for solar protection based on algae and liquenes extracts. (Machine-translation by Google Translate, not legally binding), ES2317741, 2006.
- [31] S. Benedetti, F. Canestrari, S. Scoglio, L. Zolla, Extracts of aphanizomenon flos aquae and nutritional, cosmetic and pharmaceutical compositions containing the same, WO2008000431, 2007.
- [32] S. Scoglio, F. Canestrari, S. Benedetti, L. Zolla, Extracts of aphanizomenon flos aquae (afa klamath), active compounds, and their uses, EP2032122, 2007.
- [33] S. Scoglio, F. Canestrari, S. Benedetti, L. Zolla, Extracts of aphanizomenon flos aquae and nutritional, cosmetic and pharmaceutical compositons containing the same, US20100021493, 2007.
- [34] S. Scoglio, F. Canestrari, S. Benedetti, Y. Benedetti, M. Delgado-Esteban, Alphanizomenon flos aquae preparation, extracts and purified components thereof for the treatment

of neurological, neurodegenerative and mood disorders, WO2008000430, 2007.

- [35] S. Benedetti, Y. Benedetti, F. Canestrari, M. Delgado-Esteban, S. Scoglio, Alphanizomenon flos aquae preparation, extracts and purified components thereof for the treatment of neurological, neurodegenerative and mood disorders, EP2046354, 2007.
- [36] S. Scoglio, F. Canestrari, S. Benedetti, Y. Benedetti, M. Delgado-Esteban, Alphanizomenon flos aquae preparation, extracts and purified components thereof for the treatment of neurological, neurodegenerative and mood disorders, US20090311286, 2007.
- [37] M. Miyamoto, M. Sakakibara, M. Torii, Mycosporin-like amino acid derivative having glycosyl group and method for producing the same, JP2009120562, 2007.
- [38] Gao Kunshan, Li Ping, Xu Juntian, Chen Zhihui, Qiu Yuming, Cosmetic including natural substance having sun-screening function, CN101061995, 2007.
- [39] S. Abe, K. Koganemaru, K. Tsuge, T. Tsuruhashi, H. Tsuruta, M. Yoshiki, T. Yoshimura, Antioxidant compound, antioxidant algae extract and method for producing the same, JP2008247901A, 2008.
- [40] F. Wolf, Cosmetic sunscreen composition, GB2472021, 2009.
- [41] Taejun Han, Park Jin-hee, Method for preparing uv screening nontoxic extract from red algae, and nontoxic sunscreen using same, WO2011096628, 2010.
- [42] C. O'connor, S.C. Skill, C.A. Llewellyn, Topical composition, WO2011158041, 2011.
- [43] Z. Chaohui, Gao Xin, Xu Zhiheng, Xu Jiachao, Preparation method for laver mycosporine-like amino acids Porphyra-334, CN102659621, 2012.
- [44] Su Zhenhong, Lin Jing, Wang Fang, Beauty product containing desert algae radiation-proof ingredient and natural medical whitening ingredient and preparation method thereof, CN102764206, 2012.
- [45] E. Abou-Khalil, S. RAEPPEL, F. Raepfel, Imino compounds as protecting agents against ultraviolet radiations, WO2013181741, 2013.
- [46] E. Abou-Khalil, S. Raepfel, F. Raepfel, Imino compounds as protecting agents against ultraviolet radiations, US20150152046, 2013.

- [47] K. Ishihara, R. Watanabe, T. Suzuki, T. Sakamoto, S. Matsugo, N. Wada, H. Takenaka, Y. Yamaguchi, Mycosporine-like amino acid and method for producing the same, UV protection agent, and antioxidant, JP6049200B2, 2013.
- [48] K. Ishihara, R. Watanabe, T. Suzuki, T. Sakamoto, S. Matsusato, N. Wada, H. Takenaka, Y. Yamaguchi, Mycosporin-like amino acids, production method thereof, uv protecting agents and antioxidants, JP2014227339, 2013.
- [49] Yu Gongliang, Li Renhui, A kind of method extracting class mycetocyte element amino acid Shinorine from *Microcystis aeruginosa*, CN103755589, 2013.
- [50] N. QVIT-RAZ, T. ALTMAN, Topical composition comprising transformed bacteria expressing a compound of interest, WO2014025938, 2013.
- [51] N. Qvit-Raz, T. Altman, Topical composition comprising transformed bacteria expressing a compound of interest, US20160000701, 2015.
- [52] J. Ryan, M. York, Synthesis of uv absorbing compounds, WO2014082124, 2013.
- [53] M. York, J. Ryan, Synthesis of uv absorbing compounds, US20150299124, 2013.
- [54] Mo Sang-hyun, Chong Tae-Hyon, Jeonghoon Lee, Seo Hyo-hyun, Jeong Haesoo, Moonjin Cho, Hyun Lee, Shin Dongseon, Lee Yoo-ri, Binary, Kim Hyung Sik, Anti-UV composition for skin external application comprising peptide derivatives from extract of microalgae comprising the same, KR20150008238A, 2013.
- [55] M. York, J. Ryan, G.P. SAVAGE, A.G. Meyer, K. Jarvis, UV absorbing compounds, compositions comprising same and uses thereof, WO2015006803, 2014.
- [56] M. York, J. Ryan, G.P. SAVAGE, A.G. Meyer, K. Jarvis, UV absorbing compounds, compositions comprising same and uses thereof, US20160244409, 2014.
- [57] N. QVIT-RAZ, Topical formulations for uv protection, WO2015195546, 2015.
- [58] H. Ikeda, Y. Shogo, M. Atsushi, M. Sota, Method for producing mycosporine-like amino acid using microbes, WO2015174427, 2015.
- [59] H. Ikeda, S. Yamamoto, J. Matsumoto, M. Sota, Method for producing mycosporine-like amino acid using microbes, US2017202762A1, 2015.
- [60] H. Ikeda, S. Yamamoto, J. Matsumoto, M. Sota, Method for producing mycosporine-like amino acid using microbes, EP3144392A1, 2015.

- [61] K. Matsuyama, Y. Shogo, Novel mycosporine-like amino acid, WO2017082144A1, 2016.
- [62] Kiwoo Kim, Yang Dongju, Mo Sang-hyun, Yoonhee Choi, Seo Hyo-hyun, Jeonghoon Lee, Kim Hyung Sik, Wound healing composition for skin external application comprising Mycosporine-like amino acid and Method for Preparing the Same, KR20170090690A, 2016.
- [63] Zhou Haomiao, Bi Tianyu, Liu Li, Yang Panpan, Bi Yongxian, Jiang Ligang, Culture method capable of improving mycosporine-like amino acid content in umbilical laver, CN105684880B, 2016.
- [64] A. Yamamoto, K. Nakamura, K. Morotomi, Extraction of mycosporine-like amino acids consisting of amino acid derivatives, separation and purification with chemically modified surface-modified activated carbon filler, and automation of their production, JP6058853B1, 2016.
- [65] S. Kim, K. Lee, J.H. Lee, J. SEOK, J.W. Jang, Microorganism for producing a mycosporine-like amino acid method for producing a mycosporine-like amino acid using the same, CA3072748A1, 2017.
- [66] Kim Sol, Seok Jong-cheol, Gyuseong Lee, Jaewoo Jang, A microorganism for producing a Mycosporine-like amino acid and a method for preparing a Mycosporine-like amino acid using the same, KR102003911B1, 2018.
- [67] F. ULICZKA-OPITZ, M. SCHOTTKOWSKI, U. Duhring, Production of mycosporine-like amino acids in cyanobacteria, WO2019094447A2, 2018.
- [68] S. Kim, K. LEE, J.H. Lee, J. Seok, J. woo Jang, Microorganism for producing a mycosporine-like amino acid and method for producing a mycosporine-like amino acid using the same, US20200283810A1, 2020.
- [69] A. Matsumoto, K. Matsuyama, S. Yamamoto, K. Kanazawa, Solution containing stabilized mycosporine-like amino acid and method for producing the same, JP2020114871A, 2020.
- [70] V. Shukla, R. Kumari, D.K. Patel, D.K. Upreti, Characterization of the diversity of mycosporine-like amino acids in lichens from high altitude region of Himalaya, *Amino Acids*. 48 (2016) 129–136. doi:10.1007/s00726-015-2069-z.
- [71] S. Ito, Y. Hirata, Isolation and structure of a mycosporine from the zoanthid *Palythoa tuberculosa*, *Tetrahedron Lett.* 18 (1977) 2429–2430. doi:10.1016/S0040-4039(01)83784-9.

- [72] F. Chioccare, A. Delia Gala, M. De Rosa, E. Novellino, G. Prota, Mycosporine aminoacids and related compounds from the eggs of fishes, *Bull. Des Sociétés Chim. Belges*. 89 (2010) 1101–1106. doi:10.1002/bscb.19800891212.
- [73] F. Chioccare, L. Zeuli, E. Novellino, Occurrence of mycosporine related compounds in sea urchin eggs, *Comp. Biochem. Physiol. Part B Comp. Biochem.* 85 (1986) 459–461. doi:10.1016/0305-0491(86)90027-1.
- [74] P.A. Plack, N.W. Fraser, P.T. Grant, C. Middleton, A.I. Mitchell, R.H. Thomson, Gadusol, an enolic derivative of cyclohexane-1,3-dione present in the roes of cod and other marine fish. Isolation, properties and occurrence compared with ascorbic acid, *Biochem. J.* 199 (1981) 741–747. doi:10.1042/bj1990741.
- [75] P.T. Grant, C. Middleton, P.A. Plack, R.H. Thomson, The isolation of four aminocyclohexenimines (mycosporines) and a structurally related derivative of cyclohexane-1:3-dione (gadusol) from the brine shrimp, *Artemia*, *Comp. Biochem. Physiol. Part B Comp. Biochem.* 80 (1985) 755–759. doi:10.1016/0305-0491(85)90457-2.
- [76] P.T. Grant, P.A. Plack, R.H. Thomson, Gadusol, a metabolite from fish eggs, *Tetrahedron Lett.* 21 (1980) 4043–4044. doi:10.1016/S0040-4039(00)92866-1.
- [77] Y. Oda, Q. Zhang, S. Matsunaga, M.J. Fujita, R. Sakai, Two new mycosporine-like amino acids LC-343 and mycosporine-ethanolamine from the micronesian marine sponge *Lendenfeldia chondrodes*, *Chem. Lett.* 46 (2017) 1272–1274. doi:10.1246/cl.170490.
- [78] J.D. White, J.H. Cammack, K. Sakuma, The synthesis and absolute configuration of mycosporins. A novel application of the Staudinger reaction, *J. Am. Chem. Soc.* 111 (1989) 8970–8972. doi:10.1021/ja00206a059.
- [79] C. Oyamada, M. Kaneniwa, K. Ebitani, M. Murata, K. Ishihara, Mycosporine-like amino acids extracted from scallop (*Patinopecten yessoensis*) ovaries: UV protection and growth stimulation activities on human cells, *Mar. Biotechnol.* 10 (2008) 141–150. doi:10.1007/s10126-007-9043-z.
- [80] Y. Sun, N. Zhang, J. Zhou, S. Dong, X. Zhang, L. Guo, G. Guo, Distribution, contents, and types of mycosporine-like amino acids (MAAs) in marine macroalgae and a database for MAAs based on these characteristics, *Mar. Drugs.* 18 (2020) 43. doi:10.3390/md18010043.
- [81] V. Geraldés, F.R. Jacinavicius, D.B. Genuário, E. Pinto, Identification and distribution of mycosporine-like amino acids in Brazilian cyanobacteria using ultrahigh-performance liquid chromatography with diode array detection coupled to quadrupole time-of-flight mass spectrometry, *Rapid Commun. Mass Spectrom.* (2020). doi:10.1002/rcm.8634.

- [82] S. Jeffrey, H. MacTavish, W. Dunlap, M. Vesik, K. Groenewoud, Occurrence of UVA- and UVB-absorbing compounds in 152 species (206 strains) of marine microalgae, *Mar. Ecol. Prog. Ser.* 189 (1999) 35–51. doi:10.3354/meps189035.
- [83] D. Karentz, F.S. McEuen, M.C. Land, W.C. Dunlap, Survey of mycosporine-like amino acid compounds in Antarctic marine organisms: Potential protection from ultraviolet exposure, *Mar. Biol.* 108 (1991) 157–166. doi:10.1007/BF01313484.
- [84] B. Leite, R.L. Nicholson, Mycosporine-alanine: A self-inhibitor of germination from the conidial mucilage of *Colletotrichum graminicola*, *Exp. Mycol.* 16 (1992) 76–86. doi:10.1016/0147-5975(92)90043-Q.
- [85] N. Wada, T. Sakamoto, S. Matsugo, Mycosporine-Like Amino Acids and Their Derivatives as Natural Antioxidants, *Antioxidants*. 4 (2015) 603–646. doi:10.3390/antiox4030603.
- [86] E. Nakamura, J. Kobayashi, R. Abe, Mycosporin-Like Amino Acid, JP 1984137450 A, 1984.
- [87] J.I. Carreto, S. Roy, K. Whitehead, C.A. Llewellyn, M.O. Carignan, UV-absorbing ‘pigments’: mycosporine-like amino acids, in: *Phytoplankt. Pigment.*, 2012: pp. 412–442. doi:10.1017/cbo9780511732263.015.
- [88] C. Roullier, M. Chollet-Krugler, A. Bernard, J. Boustie, Multiple dual-mode centrifugal partition chromatography as an efficient method for the purification of a mycosporine from a crude methanolic extract of *Lichina pygmaea*, *J. Chromatogr. B*. 877 (2009) 2067–2073. doi:10.1016/j.jchromb.2009.05.040.
- [89] E. Nazifi, N. Wada, T. Asano, T. Nishiuchi, Y. Iwamuro, S. Chinaka, S. Matsugo, T. Sakamoto, Characterization of the chemical diversity of glycosylated mycosporine-like amino acids in the terrestrial cyanobacterium *Nostoc commune*, *J. Photochem. Photobiol. B Biol.* 142 (2015) 154–168. doi:10.1016/j.jphotobiol.2014.12.008.
- [90] E. Nazifi, N. Wada, T. Asano, T. Nishiuchi, Y. Iwamuro, S. Chinaka, S. Matsugo, T. Sakamoto, Corrigendum to “Characterization of the chemical diversity of glycosylated mycosporine-like amino acids in the terrestrial cyanobacterium *Nostoc commune*” [*J. Photochem. Photobiol. B Biol.* 142 (2015) 154–168], *J. Photochem. Photobiol. B Biol.* 144 (2015) 75. doi:10.1016/j.jphotobiol.2015.02.004.
- [91] N. Arpin, Mycosporines: review and new data concerning their structure, *Rev. Mycol.* 43 (1979) 247–257.
- [92] M.-C. Lunel, N. Arpin, J. Favre-Bonvin, Structure de la Nor-Mycosporine Glutamine, nouvelle substance isolée de (*Bull. ex Fr.*) *Fuckel*, *Tetrahedron Lett.* 21 (1980) 4715–4716.

doi:10.1016/0040-4039(80)88101-9.

- [93] N. Arpin, Structure de la mycosporine 2, nouvelle molécule, isolée de *Botrytis cinerea*, (1977).
- [94] J. Fayret, J. Bernillon, M.-L. Bouillant, J. Favre-Bonvin, N. Arpin, Open and ring forms of mycosporin-2 from the ascomycete *Gnomonia leptostyla*, *Phytochemistry*. 20 (1981) 2709–2710. doi:10.1016/0031-9422(81)85273-9.
- [95] W.R. Stochaj, W.C. Dunlap, J.M. Shick, Two new UV-absorbing mycosporine-like amino acids from the sea anemone *Anthopleura elegantissima* and the effects of zooxanthellae and spectral irradiance on chemical composition and content, *Mar. Biol.* 118 (1994) 149–156. doi:10.1007/BF00699229.
- [96] L. Zhang, L. Li, Q. Wu, Protective effects of mycosporine-like amino acids of *Synechocystis* sp. PCC 6803 and their partial characterization, *J. Photochem. Photobiol. B Biol.* 86 (2007) 240–245. doi:10.1016/j.jphotobiol.2006.10.006.
- [97] J. Pathak, R. Richa, A.S. Sonker, V.K. Kannaujiya, R.P. Sinha, Isolation and partial purification of scytonemin and mycosporine-like amino acids from biological crusts, *J. Chem. Pharm. Res.* 7 (2015) 362–371.
- [98] J. Bernillon, M.-L. Bouillant, J.-L. Pittet, J. Favre-Bonvin, N. Arpin, Mycosporine glutamine and related mycosporines in the fungus *Pyronema omphalodes*, *Phytochemistry*. 23 (1984) 1083–1087. doi:10.1016/S0031-9422(00)82614-X.
- [99] M. Katoch, R. Mazmouz, R. Chau, L.A. Pearson, R. Pickford, B.A. Neilan, Heterologous production of cyanobacterial mycosporine-like amino acids mycosporine-ornithine and mycosporine-lysine in *Escherichia coli*, *Appl. Environ. Microbiol.* 82 (2016) 6167–6173. doi:10.1128/AEM.01632-16.
- [100] F. Lemoyne, J. Bernillon, J. Favre-Bonvin, M.L. Bouillant, N. Arpin, Occurrence and characteristics of amino alcohols and cyclohexenone. Components of fungal mycosporines, *Zeitschrift Für Naturforsch. C.* 40 (1985) 612–616. doi:10.1515/znc-1985-9-1004.
- [101] J. Favre-Bonvin, J. Bernillon, N. Salin, N. Arpin, Biosynthesis of mycosporines: Mycosporine glutaminol in *Trichothecium roseum*, *Phytochemistry*. 26 (1987) 2509–2514. doi:10.1016/S0031-9422(00)83866-2.
- [102] T. Nguyen, M. Chollet-Krugler, F. Lohézic-Le Dévéhat, I. Rouaud, J. Boustie, Mycosporine-like compounds in chlorolichens: isolation from *Dermatocarpon luridum* and



*Dermatocarpon miniatum*, and their photoprotective properties, *Planta Medica Lett.* 2 (2015) e1–e5. doi:10.1055/s-0034-1396321.

- [103] C. Roullier, M. Chollet-Krugler, E.-M. Pferschy-Wenzig, A. Maillard, G.N. Rechberger, B. Legouin-Gargadennec, R. Bauer, J. Boustie, Characterization and identification of mycosporines-like compounds in cyanolichens. Isolation of mycosporine hydroxyglutamicol from *Nephroma laevigatum* Ach., *Phytochemistry*. 72 (2011) 1348–1357. doi:10.1016/j.phytochem.2011.04.002.
- [104] F. Garcia-Pichel, R.W. Castenholz, Occurrence of UV-absorbing, mycosporine-like compounds among cyanobacterial isolates and an estimate of their screening capacity, *Appl. Environ. Microbiol.* 59 (1993) 163–169. doi:10.1128/AEM.59.1.163-169.1993.
- [105] H. Young, V.J. Patterson, A UV protective compound from *Glomerella cingulata*—a mycosporine, *Phytochemistry*. 21 (1982) 1075–1077. doi:10.1016/S0031-9422(00)82419-X.
- [106] A. Hartmann, A. Holzinger, M. Ganzera, U. Karsten, Prasiolin, a new UV-sunscreen compound in the terrestrial green macroalga *Prasiola calophylla* (Carmichael ex Greville) Kützing (Trebouxiophyceae, Chlorophyta), *Planta*. 243 (2016) 161–169. doi:10.1007/s00425-015-2396-z.
- [107] K.H.M. Cardozo, L.G. Marques, V.M. Carvalho, M.O. Carignan, E. Pinto, E. Marinho-Soriano, P. Colepicolo, Analyses of photoprotective compounds in red algae from the Brazilian coast, *Rev. Bras. Farmacogn.* 21 (2011) 202–208. doi:10.1590/S0102-695X2011005000047.
- [108] S. Takano, D. Uemura, Y. Hirata, Isolation and structure of a new amino acid, palythine, from the zoanthid, *Tetrahedron Lett.* 19 (1978) 2299–2300. doi:10.1016/S0040-4039(01)91519-9.
- [109] I. Tsujino, K. Yabe, I. Sekikawa, N. Hamanaka, Isolation and structure of a mycosporine from the red alga, *Tetrahedron Lett.* 19 (1978) 1401–1402. doi:10.1016/S0040-4039(01)94556-3.
- [110] W. K., K. D., H. J., Mycosporine-like amino acids (MAAs) in phytoplankton, a herbivorous pteropod (*Limacina helicina*), and its pteropod predator (*Clione antarctica*) in McMurdo Bay, Antarctica, *Mar. Biol.* 139 (2001) 1013–1019. doi:10.1007/s002270100654.
- [111] M. Kamio, C.E. Kicklichter, L. Nguyen, M.W. Germann, C.D. Derby, Isolation and structural elucidation of novel mycosporine-like amino acids as alarm cues in the defensive ink secretion of the sea hare *Aplysia californica*, *Helv. Chim. Acta.* 94 (2011) 1012–1018. doi:10.1002/hlca.201100117.

- [112] N. Werner, M. Orfanoudaki, A. Hartmann, M. Ganzer, R. Sommaruga, Low temporal dynamics of mycosporine-like amino acids in benthic cyanobacteria from an alpine lake, *Freshw. Biol.* 66 (2021) 169–176. doi:10.1111/fwb.13627.
- [113] M. Orfanoudaki, A. Hartmann, U. Karsten, M. Ganzer, Chemical profiling of mycosporine-like amino acids in twenty-three red algal species, *J. Phycol.* 55 (2019) 393–403. doi:10.1111/jpy.12827.
- [114] T.T. Teai, P. Raharivelomanana, J.-P. Bianchini, R. Faure, P.M. Martin, A. Cambon, Structure de deux nouvelles iminomycosporines isolées de *Pocillopora eydouxi*, *Tetrahedron Lett.* 38 (1997) 5799–5800. doi:10.1016/S0040-4039(97)01281-1.
- [115] I. Sekikawa, Isolation and structure of a 357 nm UV-absorbing substance, usujirene, from the red alga *Palmaria palmata* (L.) O. Kuntze, *Jpn. J. Phycol.* 34 (1986) 185–188.
- [116] K.H.M. Cardozo, Estudos de compostos fotoprotetores da radiação ultravioleta em algas: Aminoácidos tipo micosporinas (MAAs), Universidade de São Paulo, 2007.
- [117] S. Takano, D. Uemura, Y. Hirata, Isolation and structure of two new amino acids, palythanol and palythene, from the zoanthid, *Tetrahedron Lett.* 19 (1978) 4909–4912. doi:10.1016/S0040-4039(01)85768-3.
- [118] M.O. Carignan, K.H.M. Cardozo, D. Oliveira-Silva, P. Colepicolo, J.I. Carreto, Palythine–threonine, a major novel mycosporine-like amino acid (MAA) isolated from the hermatypic coral *Pocillopora capitata*, *J. Photochem. Photobiol. B Biol.* 94 (2009) 191–200. doi:10.1016/j.jphotobiol.2008.12.001.
- [119] E. Nazifi, N. Wada, M. Yamaba, T. Asano, T. Nishiuchi, S. Matsugo, T. Sakamoto, Glycosylated Porphyra-334 and Palythine-Threonine from the Terrestrial Cyanobacterium *Nostoc commune*, *Mar. Drugs.* 11 (2013) 3124–3154. doi:10.3390/md11093124.
- [120] J.J. Wu Won\*, B.E. Chalker, J.A. Rideout, Two new UV-absorbing compounds from *Stylophora pistillata*: sulfate esters of mycosporine-like amino acids, *Tetrahedron Lett.* 38 (1997) 2525–2526. doi:10.1016/S0040-4039(97)00391-2.
- [121] H. Nakamura, J. Kobayashi, Y. Hirata, Isolation and structure of a 330 nm UV-absorbing substance, asterina-330 from the starfish *Asterina pectinifera*, *Chem. Lett.* 10 (1981) 1413–1414. doi:10.1246/cl.1981.1413.
- [122] L. Kedar, Y. Kashman, A. Oren, Mycosporine-2-glycine is the major mycosporine-like amino acid in a unicellular cyanobacterium (*Euhalothece* sp.) isolated from a gypsum

crust in a hypersaline saltern pond, *FEMS Microbiol. Lett.* 208 (2002) 233–237. doi:10.1111/j.1574-6968.2002.tb11087.x.

- [123] J. Shick, W. Dunlap, B. Chalker, A. Banaszak, T. Rosenzweig, Survey of ultraviolet radiation-absorbing mycosporine-like amino acids in organs of coral reef holothuroids, *Mar. Ecol. Prog. Ser.* 90 (1992) 139–148. doi:10.3354/meps090139.
- [124] D.A. White, L. Polimene, C.A. Llewellyn, Effects of ultraviolet-a radiation and nutrient availability on the cellular composition of photoprotective compounds in *glenodinium foliaceum* (dinophyceae)1, *J. Phycol.* 47 (2011) 1078–1088. doi:10.1111/j.1529-8817.2011.01046.x.
- [125] J.J. Wu Won, J.A. Rideout, B.E. Chalker, Isolation and structure of a novel mycosporine-like amino acid from the reef-building corals *Pocillopora damicornis* and *Stylophora pistillata*, *Tetrahedron Lett.* 36 (1995) 5255–5256. doi:10.1016/0040-4039(95)00950-H.
- [126] M. Orfanoudaki, A. Hartmann, H. Miladinovic, H. Nguyen Ngoc, U. Karsten, M. Ganzera, Bostrychines A–F, six novel mycosporine-like amino-acids and a novel Betaine from the red alga *Bostrychia scorpioides*, *Mar. Drugs.* 17 (2019) 356. doi:10.3390/md17060356.
- [127] V. Geraldés, L.S. de Medeiros, S.T. Lima, D.O. Alvarenga, R. Gacesa, P.F. Long, M.F. Fiore, E. Pinto, Genetic and biochemical evidence for redundant pathways leading to mycosporine-like amino acid biosynthesis in the cyanobacterium *Sphaerospermopsis torques-reginae* ITEP-024, *ALGAE.* 35 (2020) 177–187. doi:10.4490/algae.2020.35.5.19.
- [128] M. Volkmann, A.A. Gorbushina, L. Kedar, A. Oren, Structure of euhalothec-362, a novel red-shifted mycosporine-like amino acid, from a halophilic cyanobacterium (*Euhalotheca* sp.), *FEMS Microbiol. Lett.* 258 (2006) 50–54. doi:10.1111/j.1574-6968.2006.00203.x.
- [129] I. Tsujino, Isolation and structure of a new amino acid, shinorine, from the red alga *Chondrus yendoi* Yamada et Mikami, (1980).
- [130] Richa, R.P. Sinha, Biochemical characterization of sunscreens mycosporine-like amino acids from two *Nostoc* species inhabiting diverse habitats, *Protoplasma.* 252 (2015) 199–208. doi:10.1007/s00709-014-0674-4.
- [131] M.O. Carignan, J.I. Carreto, Characterization of mycosporine-serine-glycine methyl ester, a major mycosporine-like amino acid from dinoflagellates: a mass spectrometry study, *J. Phycol.* 49 (2013) 680–688. doi:10.1111/jpy.12076.
- [132] W.M. Bandaranayake, J.E. Bemis, D.J. Bourne, Ultraviolet absorbing pigments from the marine sponge *Dysidea herbacea*: Isolation and structure of a new mycosporine,

Comp. Biochem. Physiol. Part C Pharmacol. Toxicol. Endocrinol. 115 (1996) 281–286. doi:10.1016/S0742-8413(96)00135-1.

- [133] A. Hartmann, K. Becker, U. Karsten, D. Remias, M. Ganzera, Analysis of mycosporine-like amino acids in selected algae and cyanobacteria by hydrophilic interaction liquid chromatography and a novel MAA from the red alga *Catenella repens*, *Mar. Drugs*. 13 (2015) 6291–6305. doi:10.3390/md13106291.
- [134] A. Hartmann, K. Glaser, A. Holzinger, M. Ganzera, U. Karsten, Klebsormidin A and B, Two New UV-Sunscreen Compounds in Green Microalgal *Interfilum* and *Klebsormidium* Species (Streptophyta) From Terrestrial Habitats, *Front. Microbiol.* 11 (2020) 499. doi:10.3389/fmicb.2020.00499.
- [135] P.M. D'Agostino, V.S. Javalkote, R. Mazmouz, R. Pickford, P.R. Puranik, B.A. Neilan, Comparative profiling and discovery of novel glycosylated mycosporine-Like amino acids in two strains of the cyanobacterium *Scytonema cf. crispum*, *Appl. Environ. Microbiol.* 82 (2016) 5951–5959. doi:10.1128/AEM.01633-16.
- [136] R. Sommaruga, D. Libkind, M. van Broock, K. Whitehead, Mycosporine-glutaminol-glucoside, a UV-absorbing compound of two *Rhodotorula* yeast species, *Yeast*. 21 (2004) 1077–1081. doi:10.1002/yea.1148.
- [137] M. Volkmann, K. Whitehead, H. Rütters, J. Rullkötter, A.A. Gorbushina, Mycosporine-glutamicol-glucoside: a natural UV-absorbing secondary metabolite of rock-inhabiting microcolonial fungi, *Rapid Commun. Mass Spectrom.* 20 (2006) 2520–2520. doi:10.1002/rcm.2616.
- [138] M.-L. Bouillant, J.-L. Pittet, J. Bernillon, J. Favre-Bonvin, N. Arpin, Mycosporins from *Ascochyta pisi*, *Cladosporium herbarum* and *Septoria nodorum*, *Phytochemistry*. 20 (1981) 2705–2707. doi:10.1016/0031-9422(81)85272-7.
- [139] K. Matsui, E. Nazifi, S. Kunita, N. Wada, S. Matsugo, T. Sakamoto, Novel glycosylated mycosporine-like amino acids with radical scavenging activity from the cyanobacterium *Nostoc commune*, *J. Photochem. Photobiol. B Biol.* 105 (2011) 81–89. doi:10.1016/j.jphotobiol.2011.07.003.
- [140] A. Torres, M. Hochberg, I. Pergament, R. Smoum, V. Niddam, V.M. Dembitsky, M. Temina, I. Dor, O. Lev, M. Srebnik, C.D. Enk, A new UV-B absorbing mycosporine with photo protective activity from the lichenized ascomycete *Collema cristatum*, *Eur. J. Biochem.* 271 (2004) 780–784. doi:10.1111/j.1432-1033.2004.03981.x.
- [141] K. Ishihara, R. Watanabe, H. Uchida, T. Suzuki, M. Yamashita, H. Takenaka, E. Nazifi, S. Matsugo, M. Yamaba, T. Sakamoto, Novel glycosylated mycosporine-like amino acid, 13- O -(β-galactosyl)-porphyra-334, from the edible cyanobacterium *Nostoc sphaericum* -protective activity on human keratinocytes from UV light, *J. Photochem. Photobiol. B Biol.* 172 (2017) 102–108. doi:10.1016/j.jphotobiol.2017.05.019.

- [142] T. Sakamoto, A. Hashimoto, M. Yamaba, N. Wada, T. Yoshida, K. Inoue-Sakamoto, T. Nishiuchi, S. Matsugo, Four chemotypes of the terrestrial cyanobacterium *Nostoc commune* characterized by differences in the mycosporine-like amino acids, *Phycol. Res.* 67 (2019) 3–11.

**Publisher's Note:** MDPI stays neutral with regard to jurisdictional claims in published maps and institutional affiliations.

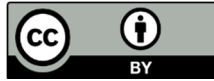

© 2020 by the authors. Submitted for possible open access publication under the terms and conditions of the Creative Commons Attribution (CC BY) license (<http://creativecommons.org/licenses/by/4.0/>).
